# Supplementary material
Source: PubMed Central journal article supplement (PMC8266740)
Supplement: NIHMS1674575-supplement-Supplementary_Material.pdf [file NIHMS1674575-supplement-Supplementary_Material.pdf]

## Supplemental Information

### INTRAOPERATIVE MASS SPECTROMETRY BASED PLATFORM FOR IDH MUTATION STATUS, GLIOMA DIAGNOSIS, AND ESTIMATION OF TUMOR CELL INFILTRATION

Hannah Marie Brown<sup>1‡</sup>, Clint M. Alfaro<sup>1‡</sup>, Valentina Pirro<sup>1‡</sup>, Mahua Dey<sup>2#</sup>, Eyas M. Hattab<sup>3</sup>,  
Aaron A. Cohen-Gadol<sup>2</sup>, R. Graham Cooks<sup>1\*</sup>

<sup>1</sup>Department of Chemistry, Purdue University, West Lafayette, Indiana; and <sup>2</sup>Department of Neurological Surgery, Indiana University School of Medicine, Goodman Campbell Brain and Spine, Indianapolis, Indiana; <sup>3</sup>Department of Pathology and Laboratory Medicine, University of Louisville, Kentucky

‡Authors contributed equally

# Present address Department of Neurological Surgery, University of Wisconsin Medical School, Medical School, Madison, Wisconsin

**Running Title:** Intraoperative DESI-MS for glioma diagnosis

## Contents

|                               |      |
|-------------------------------|------|
| Supplemental Methods.....     | p. 2 |
| Supplemental Discussion ..... | p.6  |
| Supplemental Figures.....     | p. 8 |
| Supplemental Tables.....      | p.11 |

## **Supplemental Methods**

### ***Intraoperative Patient Cohort***

A total of 58 human subjects were enrolled in our study. Of those, six subjects were clinical screenfails and subsequently excluded. Data from three subjects were excluded due to poor desorption electrospray ionization (DESI) signal. This resulted in 49 human subjects from whom tissue was collected and analyzed with desorption electrospray ionization-mass spectrometry (DESI-MS).

A total of 247 biopsies was obtained; the average number of biopsies per subject was five. Some biopsies were smeared multiple times when additional tissue was available, resulting in 334 total tissue smears. Of these smears, 62 were excluded due to poor DESI signal or inadequate quality for histopathology, resulting in 272 smears to be used for statistical analysis for disease status and tumor cell percentage (TCP) and for comparison of DESI and histopathology. See the Supplemental Methods Data Analysis section (below) for our definition of smears with poor DESI-MS signal and why they were excluded.

The method for IDH mutation status was developed midway through the study. Therefore, it could not be used for all subjects, but it was used to analyze tissue smears (n = 164) obtained from 28 human subjects.

The average patient age was  $46 \pm 16$  years; 24 subjects were female and 25 subjects were male; the number of grade I, II, III, and IV gliomas were 1, 15, 6, and 25, respectively, with two subjects for whom WHO grades were not determined; 41 subjects had primary gliomas and eight had recurrent gliomas; 23 subjects were IDH-mut, 25 were IDH-wt, and one subject had unknown IDH status.

### ***Intraoperative DESI-MS***

The DESI spray solvent consisted of 1:1 DMF-ACN, Nitrogen gas pressure of 180 psi, solvent flow rate of 1.2  $\mu\text{L}$  / minute, spray voltage of 5kV, negative ion polarity was used. In order

to obtain a high-quality average spectrum of the sample, the DESI spray was rastered across the tissue smear in a zigzag pattern using a precision moving stage. Under certain conditions, as used in this study, DESI-MS analyzed tissue samples can be H&E stained and then interpreted by pathologists, allowing for correlations between tissue disease status as determined by these complementary methods.(24) Negative ion mode metabolite, lipid, and MS/MS data were collected as different segments in the MS over a total time of three minutes. The same smears were re-analyzed using a solvent consisting of 37:38:25 ACN-EtOH-DMF and using multiple-stage mass spectrometry for the detection of 2-hydroxyglutarate (2-HG), for an additional three minutes of data acquisition. We filled a syringe with each solvent outside the operating room (OR) prior to each case, and when analyzing the smears, we switched the syringe to the appropriate one for the method that we were running. We typically analyzed all the smears with DMF-ACN using the first method, switched the syringe, and then analyzed them all again with the 2-HG optimized solvent system using the second method.

## **Data Analysis**

### *Scan Filtering and Data Normalization for the Full-Scan Lipid and Metabolite Profiles*

The collected lipid data were filtered using standard deviation thresholds of the absolute signal intensity compared to background spectra collected from a blank glass slide. Lipid scans with signal three-standard deviations greater than the blank were retained and averaged to generate a representative lipid profile for the sample. The metabolite profiles were filtered by multivariate modeling of the background and selecting MS scans that were statistically different from the background. Metabolite scans that were significantly different to those of the blank glass slide were retained and averaged to generate a representative metabolite profile for the sample. The lipid and metabolite profile scans that were retained were normalized using standard normal variate (SNV) transformation prior to PCA to correct for baseline shifts and fluctuations in total ion count.

For some tissue smears, no scans were selected after using these data filtering criteria due to low DESI-MS signal. Average DESI-MS spectra of tissue smears were used to provide molecular diagnosis of smeared tissue biopsies on a glass slide. MS scans from areas of the glass slide containing no smeared tissue and smears giving signals of insufficient intensity were excluded by applying a cut-off value to the absolute signal intensity. For the lipid profiles, ion counts at maximum peak intensity for ions  $m/z$  768, 788, 794, 834, and 888 were summed and

plotted over the time of acquisition; these ions correspond to glycerophospholipids present in brain tissue but absent in glass. Only scans with mass spectra having summed ion counts greater than the cutoff value were used for chemical predictions. For the metabolite profile, ion counts for ions  $m/z$  89 and 175, present in diseased tissue, were summed and subtracted from the intensity of ions  $m/z$  119, 143, and 163, present on the glass slide. Likewise for the lipid profiles, only scans with mass spectra having summed ion counts greater than the cutoff value were used for chemical predictions. For each selected mass spectrum (both for lipid and metabolite profiles), the full width at half maximum (FWHM) was calculated for the base peak. All spectra with mass resolution  $< 1000$  were excluded. Smears for which no scans were selected in either the lipid or metabolite profile were excluded from further statistical analysis. The smears that provided poor signal and were excluded tended to contain acellular tissue, have sparse smear cell density, be smears with overall low cellularity, or have significant air-drying artifacts.

#### *IDH Mutation Status Using MS<sup>3</sup> Detection of 2-HG*

For IDH mutation status, the average TIC normalized intensity of the MS<sup>3</sup> fragment ions ( $m/z$  101 and 85) detected from sequential fragmentation of the 2-HG precursor ion ( $m/z$  147 in the negative mode) was used as a measure of IDH mutation status. These data were collected using the DESI-MS method outlined in Figure 1, denoted as Method 2. The MS<sup>3</sup> data for 2-HG (147- $>129->O$ ) was collected over 1.1 minutes while scanning the sample under the DESI spray in a zigzag raster pattern, similar to the method utilized for the full-scan lipid and metabolite profiles. A significant fraction of the scans contained no signal intensity, or did not contain signal for either of the 2-HG MS<sup>3</sup> product ions. For each tissue smear, scans were filtered to include only scans that contained signal for either  $m/z$  85,  $m/z$  101, or both. The retained MS<sup>3</sup> scans were normalized using the average total ion count measured in the full-scan acquisition taken in segment 3 of the 2-HG method (the MS method is shown schematically in Figure 1B and 1C in the main text.) After TIC normalization, the intensities of the two MS<sup>3</sup> product ions were summed together to provide an IDH mutation score for each smear. In instances where more than one smear was made for the same tumor core biopsy, the average normalized and summed 2-HG product ion intensity of all smears was calculated and used to predict the IDH mutation status of that biopsy. The TIC normalized and summed MS<sup>3</sup> product ion intensities were analyzed using ROC curve analysis, the Wilcoxon rank-sum test, and t-tests using Tukey HSD to account for multiple comparisons. The IDH mutation status was categorized as either IDH-mutant (IDH-mut) or IDH-wildtype (IDH-wt).

### *TCP from Full-Scan NAA Abundance*

The SNV normalized intensity of  $m/z$  174, corresponding to N-acetyl-aspartic acid (NAA), measured in the full-scan MS metabolite profile, was used to estimate (approximately) the tumor cell percentage, using a previously published data set as a training set. TCP predictions via NAA intensity used categories of low ( $TCP \leq 50\%$ ) and high ( $TCP \geq 51\%$ ).

### *TCP from MS<sup>2</sup> Monitoring of NAA*

The MS<sup>2</sup> scan include in Method 1 (Figure 1C in the main text) targeted the deprotonated ion of NAA. The MS<sup>2</sup> of NAA produces fragment ions at  $m/z$  88, 114, 130, and 156 utilizing our LTQ mass spectrometer and the given fragmentation conditions. The MS<sup>2</sup> scans were filtered to only include scans that contained intensity for all of the NAA fragment ions. After MS<sup>2</sup> scan filtering, the data were normalized using the average TIC detected in the metabolite profile scan for each tissue smear. The normalized intensities of each of the NAA MS<sup>2</sup> fragment ions were summed to calculate the NAA MS<sup>2</sup> intensity. NAA product ion intensities below the cut-off value of 5 in the MATLAB code were assigned a random value of one to five as an intensity value. The normalized and summed NAA MS<sup>2</sup> intensities were analyzed with ROC curve analysis and the Wilcoxon rank-sum test.

### *Lipid Profile Deconvolution*

Principal component regression analysis was used to calculate the percentage of white matter, grey matter, and glioma contributing to the lipid profiles of the new samples using a linear regression model built from data collected in a previous study. The model was based on the presumption that the observed lipid profile for the glioma samples were composed of a ternary mixture of white-matter, grey-matter, and glioma. The summed percentages of these three categories is 100%. The regression model was built from data collected from DESI-MS imaging of banked glioma and normal human brain specimens. Histologically correlated mass spectra were compiled based on histopathological assessment, compressed with PCA, and the average PC1 and PC2 scores for samples of pure WM, GM, and G were calculated. The three extremes (PC1 and PC2 scores corresponding to 100%WM, 100%GM, 100%G) were used to calculate the predicted PC1 and PC2 scores for each possible mixture (Supplemental Figure 1). To predict the composition of new samples, the PCA lipid profile loading matrix from the previous study was used to calculate the scores of the new samples. The calculated PC1 and PC2 scores of the new samples were matched to predicted PC1 and PC2 scores (the predicted PC1 and PC2 scores were each associated

with specific percentages of GM, WM, and G). The percentages of GM:WM:G associated with the PC1 and PC2 scores that most closely matched the calculated PC1 and PC2 scores of the new samples were used as the TCP prediction for the new samples. GM and WM were categorized as infiltrative margins (IM) to correspond with histopathological categorization. The percentage of G calculated for each unknown sample was used as an estimate of the TCP. TCP using the lipid deconvolution was categorized as low ( $TCP \leq 50\%$ ) or high ( $TCP \geq 51\%$ ).

### *Disease Diagnosis*

Diagnosis was accomplished using principal component analysis-linear discriminant analysis (PCA-LDA). First, the lipid and metabolite data were combined using mid-level data fusion on their respective PCA scores. These PCs were multiplied by the training set lipid and metabolite loading matrices to generate combined PC scores. These combined PC scores were subsequently multiplied by the training set fused loading matrix eigenvectors to calculate the fusion PC scores of the new samples. The PC scores of the new samples were then used to classify their disease status using linear discriminant analysis (LDA) eigenvectors from the training set. The disease diagnosis provided by PCA-LDA on the fused lipid and metabolite profiles obtained from DESI are glioma (G), grey matter (GM), or white matter (WM). G is indicative of diseased tissue; GM and WM are indicative of low infiltration brain tissue, referred to as infiltrative margins (I.M.).

## **Supplemental Discussion**

### ***Glioma Diagnosis using Tumor Core Biopsies***

As an intraoperative diagnostic tool to assist neurosurgery, the capability to recognize glioma when present would be useful. In some cases, a single biopsy of tumor area might be sufficient for this diagnostic information. When including a single stereotactic biopsy obtained from a T2 weighted MRI enhancing area for each case, and histopathology assessed the tissue smear as glioma, the agreement between the PCA-LDA diagnosis and histopathology was 92% (n=38). Cases 30, 32, 39, 41, 50, 52, 53 were excluded due to histopathology assessment providing a diagnosis of I.M. for all tissue smears; cases 28, 29, and 35 were excluded for lack of adequate DESI-MS signal obtained from smears for which histopathology provided a diagnosis of glioma; case 45 was excluded due to its histological diagnosis as tumor but not sufficient for diagnosis of glioma. These excluded cases are discussed in the next two subsections.

### ***Heterogeneity of Tumor Core Biopsies***

Several of the tumor core biopsies provided histopathological assessments indicating I.M. rather than G. No samples from case 41 were taken from enhancing areas based on the MRI snapshots. The DESI-MS diagnosis for these smears agrees with the histopathological assessment (DESI predicted either WM or GM and histopathology found I.M.), except for smears from case 52 and 53, which DESI predicted G rather than I.M. These cases highlight the complexity and heterogeneity of gliomas, even in tumor cores. DESI-MS methods may be useful in assessing such heterogeneity during surgery.

### ***Special Cases in Which DESI-MS Provided Potential Clinical Utility***

Tissue smears containing large amounts of necrosis and necrotic tumor are indicative of a brain pathology but not specific for glioma in the absence of viable tumor cells. Smears from case 51 and 40 show significant necrosis and necrotic tumor. The DESI-MS diagnosis of these smears was consistent with glioma. For comparison, smears from case 47, which is a high TCP glioma smear, is shown. Case 45 was suspected for lymphoma during the frozen section consultation due to the high nuclear-to-cytoplasmic ratio and discohesive nature of the tumor cells. The biopsy from this case was analyzed by DESI and provided a PCA-LDA diagnosis of G, and histopathology identified tumor but could not confidently diagnose glioma due to the morphology of this subtype (Supplemental Figure 4). The final pathology provided a diagnosis of glioblastoma based on molecular tests. These cases show that DESI-MS during surgery could provide diagnostic information during surgery that can assist in confirming a glioma diagnosis.

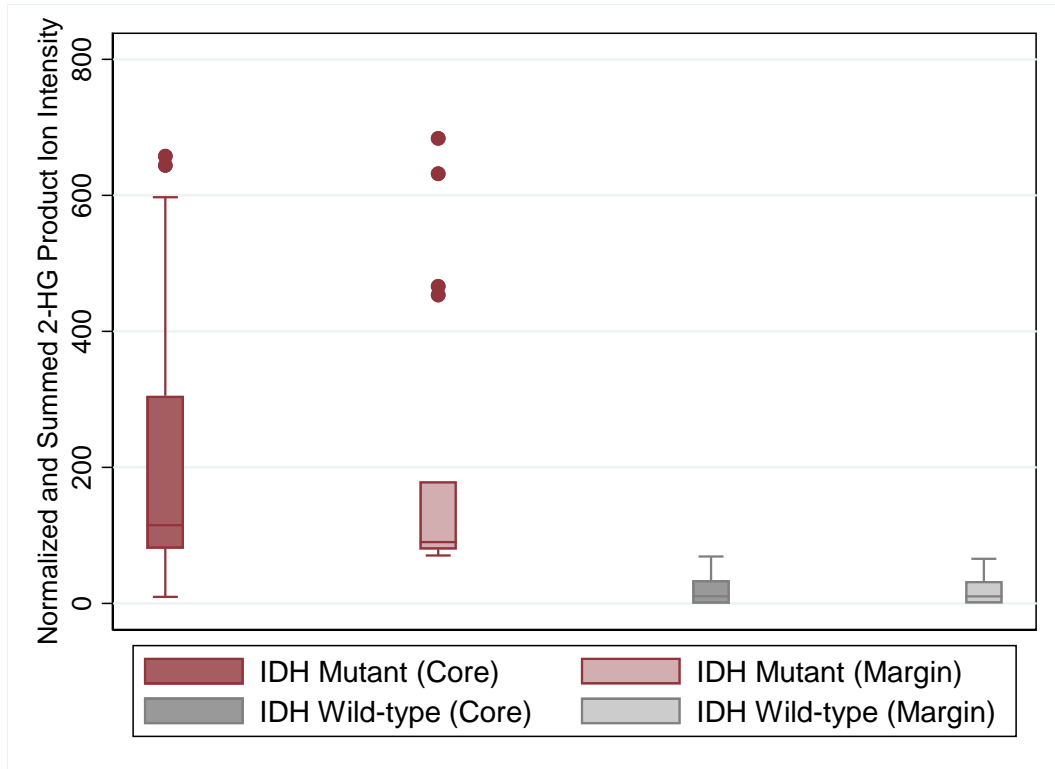

**Supplemental Figure 1.** Box plots of summed 2-HG product ion intensities, separated by IDH mutation status and biopsy location (core or margin). Biopsies from the tumor core and margins of IDH-mut tumors produced significantly higher 2-HG compared to the IDH-wt tumors ( $p < 0.0001$  using the Tukey-HSD test for statistical significance). The IDH mutant tumors produced slightly higher 2-HG in the cores compared to margins, but the difference was not statistically significant.

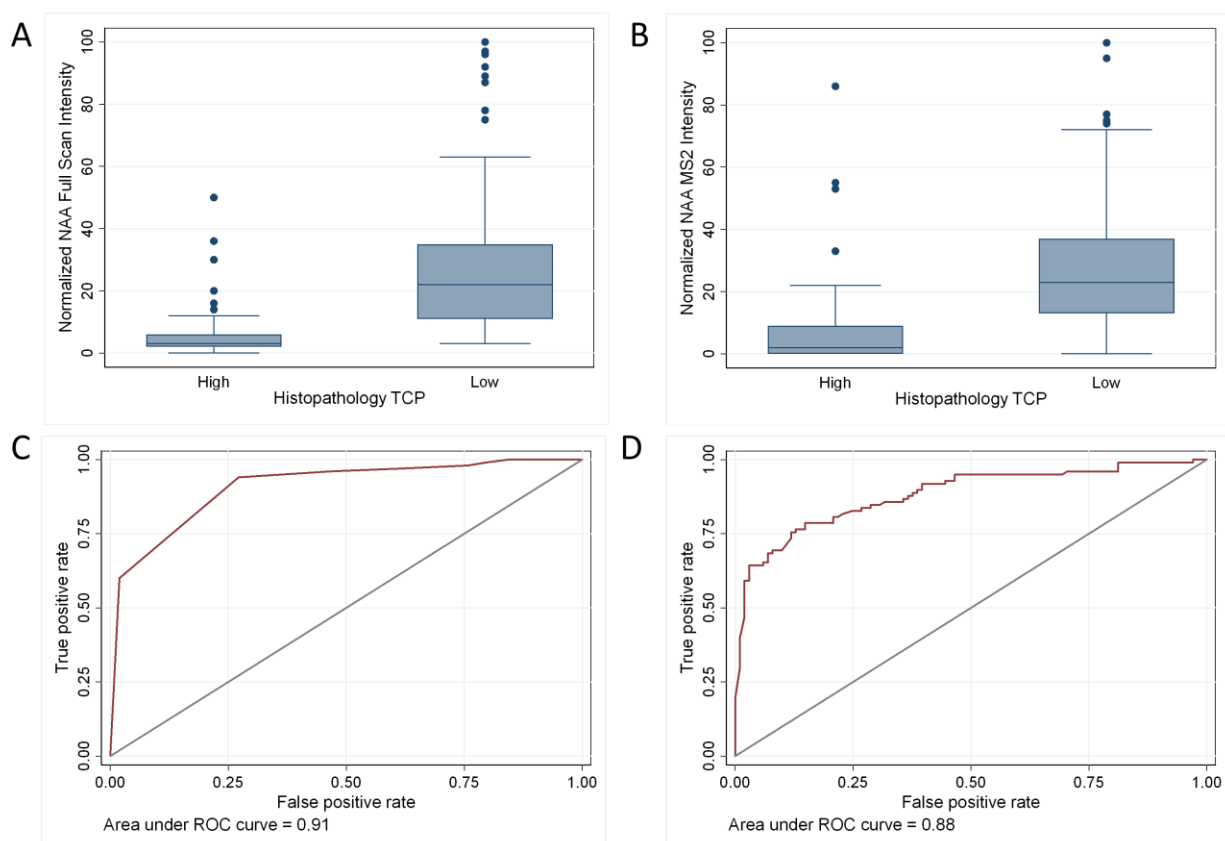

**Supplemental Figure 2.** Assessment of tumor cell percentage based on N-acetyl-aspartic acid (NAA) measurements. A) Box plot showing dispersion in the normalized full-scan  $m/z$  174 intensity (corresponding to NAA) as a function of TCP. High indicates TCP greater than or equal to 51%; Low indicates TCP less than or equal to 50% TCP. B) Box plots showing dispersion in normalized  $MS^2$  product ion intensity for NAA. C) ROC curve for A (predicting TCP high or low based on full-scan NAA intensity) provided AUC of 0.91. D) ROC curve for B (predicting TCP high or low based on  $MS^2$  NAA intensity) provide AUC of 0.88.

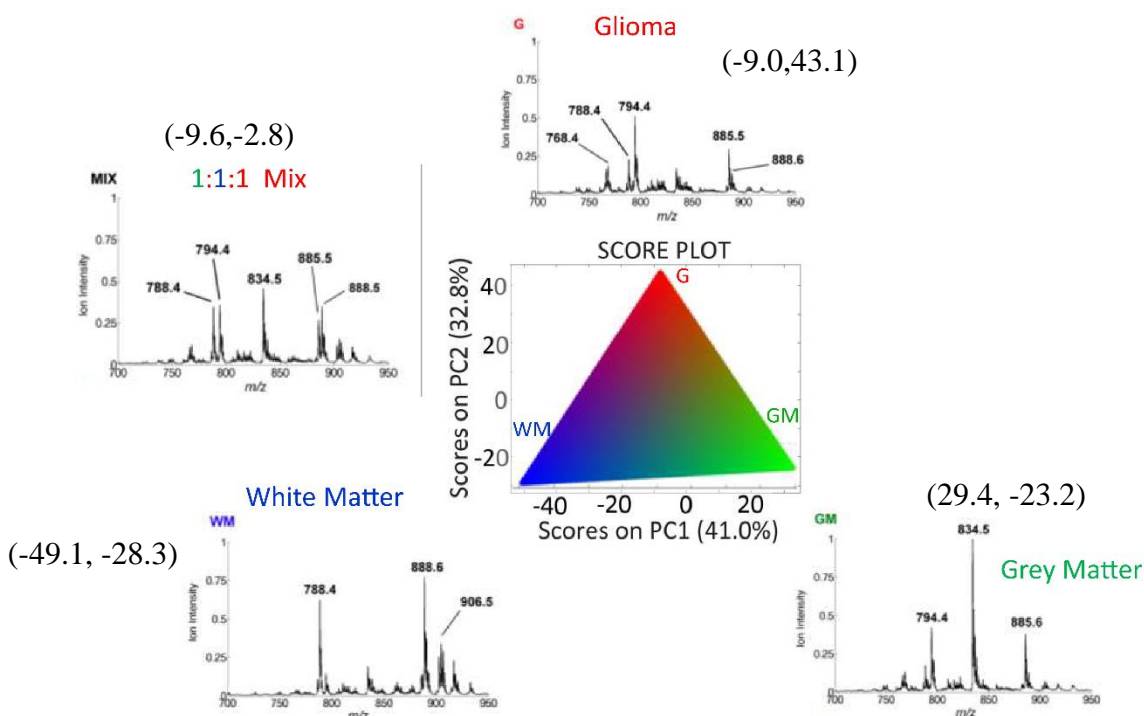

**Supplemental Figure 3.** Scheme illustrating the lipid deconvolution approach. A ternary mixture model was fitted to the lipid profile PCA data obtained from a previous study. The continuous ternary mixture is indicated by the colored triangle on the PC score plot. In the illustration, RGB color coding was used to make a continuous mixture between red (glioma (G)), blue (white matter (WM)), and green (grey matter (GM)). PC1 and PC2 coordinates corresponding to each of these RGB color codes were created, such that each pair of PC1 and PC2 coordinates corresponds to a unique combination of [G GM WM]. After projection of the new samples onto this PCA space, the model was used to predict the percentages of the reference glioma, grey matter, and white matter PCA scores that best matched the unknown spectra. The average lipid profile of the pure classes along with the (PC1, PC2) coordinates are shown around the mixture model at the corresponding vertex, along with the 1:1:1 mixture G:GM:WM. For the present study, the PCA-LDA classifications of GM and WM were recategorized as infiltrative margin (IM) to match the histopathology categories.

**Supplemental Table 1.** Confusion matrix for assessing correlation between histopathology assessments and the DESI-MS estimates of TCP and disease status of tissue biopsies from 10 subjects whose data was previously published in reference 1 (Pirro et. al. PNAS 2017).

|                                                                                                                                                          |                                          | Histopathology <sup>a</sup>                                                                                                                                  |                                          |
|----------------------------------------------------------------------------------------------------------------------------------------------------------|------------------------------------------|--------------------------------------------------------------------------------------------------------------------------------------------------------------|------------------------------------------|
|                                                                                                                                                          |                                          | High TCP/Glioma <sup>b</sup>                                                                                                                                 | Low TCP/Infiltrative Margin <sup>b</sup> |
| Lipid Deconvolution TCP Estimate                                                                                                                         | High TCP/Glioma <sup>b</sup>             | 29                                                                                                                                                           | 4                                        |
| Full-scan NAA Intensity TCP Estimate                                                                                                                     |                                          | 32                                                                                                                                                           | 5                                        |
| PCA-LDA Diagnosis                                                                                                                                        |                                          | 28                                                                                                                                                           | 4                                        |
| Lipid Deconvolution TCP Estimate                                                                                                                         | Low TCP/Infiltrative Margin <sup>b</sup> | 6                                                                                                                                                            | 19                                       |
| Full-scan NAA Intensity TCP Estimate                                                                                                                     |                                          | 3                                                                                                                                                            | 18                                       |
| PCA-LDA Diagnosis                                                                                                                                        |                                          | 9                                                                                                                                                            | 17                                       |
|                                                                                                                                                          |                                          |                                                                                                                                                              |                                          |
| <b>Lipid Deconvolution TCP Estimate:</b> <ul style="list-style-type: none"><li>Sensitivity: 83%</li><li>Specificity: 83%</li><li>Accuracy: 83%</li></ul> |                                          | <b>Full-scan NAA Intensity TCP Estimate:</b> <ul style="list-style-type: none"><li>Sensitivity: 91%</li><li>Specificity: 78%</li><li>Accuracy: 86%</li></ul> |                                          |
|                                                                                                                                                          |                                          | <b>PCA-LDA Diagnosis:</b> <ul style="list-style-type: none"><li>Sensitivity: 76%</li><li>Specificity: 81%</li><li>Accuracy: 78%</li></ul>                    |                                          |

<sup>a</sup>Histopathology assessments of TCP were used for correlation with lipid deconvolution and NAA intensity classifications of TCP. Histopathology assessments of disease status were used for correlation with PCA-LDA diagnosis of the tissue smears.

<sup>b</sup>For lipid deconvolution and NAA intensity classification, histopathology TCP categories were High  $\geq 51\%$  and Low  $\leq 50\%$ . Histopathology categories of glioma and infiltrative margin were used for correlation with PCA-LDA diagnosis of glioma and infiltrative margin.

**Supplemental Table 2.** Summary of subjects recruited, if excluded from study or analysis, and total biopsies/smears

| Study subject number | Screenfail      | Reason for Screenfail | Outlier | Reason for outlier | Previously Published* | Total Biopsies | Total Smears |
|----------------------|-----------------|-----------------------|---------|--------------------|-----------------------|----------------|--------------|
| 001                  | No              |                       | No      | -                  | 1                     | 9              | 9            |
| 002                  | No              |                       | Yes     | Poor DESI signal   | 1                     | 0              | 0            |
| 003                  | Yes             | Not glioma            | No      | -                  | 1                     | 0              | 0            |
| 004                  | No              |                       | Yes     | Poor DESI signal   | 1                     | 0              | 0            |
| 005                  | No              |                       | No      | -                  | 1                     | 7              | 8            |
| 006                  | No              |                       | No      | -                  | 1                     | 6              | 7            |
| 007                  | No              |                       | No      | -                  | 1                     | 5              | 6            |
| 008                  | Yes (withdrawn) | Resection unsafe      | No      | -                  | 1                     | 0              | 0            |
| 009                  | No              |                       | No      | -                  | 1                     | 7              | 9            |
| 010                  | No              |                       | No      | -                  | 1                     | 6              | 7            |
| 011                  | No              |                       | Yes     | Poor DESI signal   | 1                     | 0              | 0            |
| 012                  | No              |                       | No      | -                  | 1                     | 7              | 8            |
| 013                  | No              |                       | No      | -                  | 1                     | 7              | 10           |
| 014                  | No              |                       | No      | -                  | 1                     | 6              | 8            |
| 015                  | No              |                       | No      | -                  | 1                     | 6              | 9            |
| 016                  | No              |                       | No      | -                  | 1                     | 7              | 7            |
| 017                  | No              |                       | No      | -                  | N                     | 4              | 4            |
| 018                  | No              |                       | No      | -                  | N                     | 5              | 8            |
| 019                  | No              |                       | No      | -                  | N                     | 7              | 10           |
| 020                  | No              |                       | No      | -                  | N                     | 5              | 8            |
| 021                  | No              |                       | No      | -                  | N                     | 6              | 10           |
| 022                  | Yes             | Not glioma            | No      | -                  | N                     | 0              | 0            |
| 023                  | No              |                       | No      | -                  | N                     | 4              | 9            |
| 024                  | No              |                       | No      | -                  | 2                     | 2              | 3            |
| 025                  | No              |                       | No      | -                  | 2                     | 7              | 10           |
| 026                  | No              |                       | No      | -                  | 2                     | 5              | 5            |
| 027                  | No              |                       | No      | -                  | 2                     | 6              | 10           |
| 028                  | No              |                       | No      | -                  | 2                     | 5              | 8            |
| 029                  | No              |                       | No      | -                  | 2                     | 6              | 10           |
| 030                  | No              |                       | No      | -                  | 2                     | 5              | 6            |
| 031                  | No              |                       | No      | -                  | 2                     | 5              | 6            |
| 032                  | No              |                       | No      | -                  | 2                     | 5              | 7            |
| 033                  | No              |                       | No      | -                  | 2                     | 6              | 6            |
| 034                  | No              |                       | No      | -                  | 2                     | 3              | 6            |

**Supplemental Table 2. Continued**

|                                                                          |                                     |            |                                              |   |                                                             |                                                      |                                              |                                        |
|--------------------------------------------------------------------------|-------------------------------------|------------|----------------------------------------------|---|-------------------------------------------------------------|------------------------------------------------------|----------------------------------------------|----------------------------------------|
| 035                                                                      | No                                  |            | No                                           | - | 2                                                           | 6                                                    | 6                                            |                                        |
| 036                                                                      | Yes                                 | Not glioma | No                                           | - | N                                                           | 0                                                    | 0                                            |                                        |
| 037                                                                      | No                                  |            | No                                           | - | 2                                                           | 4                                                    | 5                                            |                                        |
| 038                                                                      | No                                  |            | No                                           | - | 2                                                           | 6                                                    | 6                                            |                                        |
| 039                                                                      | No                                  |            | No                                           | - | 2                                                           | 3                                                    | 3                                            |                                        |
| 040                                                                      | No                                  |            | No                                           | - | 2                                                           | 3                                                    | 6                                            |                                        |
| 041                                                                      | No                                  |            | No                                           | - | 2                                                           | 5                                                    | 5                                            |                                        |
| 042                                                                      | No                                  |            | No                                           | - | 2                                                           | 3                                                    | 3                                            |                                        |
| 043                                                                      | Yes                                 | Not glioma | No                                           | - | N                                                           | 0                                                    | 0                                            |                                        |
| 044                                                                      | No                                  | -          | No                                           | - | 2                                                           | 6                                                    | 10                                           |                                        |
| 045                                                                      | No                                  | -          | No                                           | - | 2                                                           | 1                                                    | 1                                            |                                        |
| 046                                                                      | No                                  | -          | No                                           | - | N                                                           | 6                                                    | 9                                            |                                        |
| 047                                                                      | No                                  | -          | No                                           | - | 2                                                           | 4                                                    | 8                                            |                                        |
| 048                                                                      | No                                  | -          | No                                           | - | 2                                                           | 3                                                    | 7                                            |                                        |
| 049                                                                      | Yes                                 | Not glioma | No                                           | - | N                                                           | 0                                                    | 0                                            |                                        |
| 050                                                                      | No                                  | -          | No                                           | - | N                                                           | 6                                                    | 6                                            |                                        |
| 051                                                                      | No                                  | -          | No                                           | - | 2                                                           | 6                                                    | 6                                            |                                        |
| 052                                                                      | No                                  | -          | No                                           | - | 2                                                           | 3                                                    | 4                                            |                                        |
| 053                                                                      | No                                  | -          | No                                           | - | 2                                                           | 6                                                    | 9                                            |                                        |
| 054                                                                      | No                                  | -          | No                                           | - | 2                                                           | 3                                                    | 7                                            |                                        |
| 055                                                                      | No                                  | -          | No                                           | - | N                                                           | 4                                                    | 4                                            |                                        |
| 056                                                                      | No                                  | -          | No                                           | - | N                                                           | 2                                                    | 4                                            |                                        |
| 057                                                                      | No                                  | -          | No                                           | - | N                                                           | 2                                                    | 4                                            |                                        |
| 058                                                                      | No                                  | -          | No                                           | - | N                                                           | 6                                                    | 7                                            |                                        |
| Total Subjects Included<br>(Excluding Screenfails and<br>Outliers)<br>49 | Total Screenfails<br>(Subject)<br>6 |            | Total Outliers<br>(Subject)<br>3             |   | New to<br>Glioma<br>Diagnosis<br>and TCP<br>(Subject)<br>38 | New to<br>IDH<br>Mutation<br>Assay<br>(Subject)<br>6 | Total Biopsies<br>247                        | Total<br>Smears<br>334                 |
|                                                                          | Average Screenfail Rate<br>10.3%    |            | Average<br>Outlier Rate<br>(Subject)<br>6.1% |   |                                                             |                                                      | Average<br>Biopsies<br>per<br>Subject<br>5.0 | Average<br>Smears per<br>Biopsy<br>1.4 |

\*"1" and "2" indicates that data was used in SI references 1(Pirro. et al. PNAS 2017)

and 2 (Alfaro. et al. J. Neurosurg. 2019), respectively. No subjects included in Reference 1 were included in Reference 2. "N" indicates that the data was not utilized in a previous publication. For biopsies that were utilized in Reference 2, only the 2-HG MS<sup>n</sup> data was utilized; lipid and metabolite profile data was collected using Method 1 (Figure 1, main text), but that data was not analyzed or included in the previous publication.

**Supplemental Table 3.** Study subject demographics, diagnosis, and treatment information.

| Study subject number | Age | Gender | Race | Ethnicity | Tumor location                 | Integrated diagnosis                                        | Primary/ Recurrent | F | Awake | Mapping | IMRI |
|----------------------|-----|--------|------|-----------|--------------------------------|-------------------------------------------------------------|--------------------|---|-------|---------|------|
| 001                  | 30  | M      | W    | N.H.      | Left insula                    | Oligodendroglioma , IDH-M,WHO grade II                      | P                  | Y | N     | Y       | N    |
| 005                  | 23  | M      | B    | A.A.      | Left frontal lobe              | Dysembryoplastic neuroepithelial tumor, IDH-WT, WHO grade I | P                  | N | N     | N       | N    |
| 006                  | 24  | M      | W    | N.H.      | Left frontal intra-axial       | Astrocytoma, IDH-M, WHO grade III                           | P                  | N | N     | N       | N    |
| 007                  | 65  | M      | W    | N.H.      | Right parietal lobe            | GBM, IDH-WT, WHO grade IV                                   | P                  | N | N     | N       | N    |
| 009                  | 44  | F      | W    | N.H.      | Left parietal intra-axial      | Oligodendroglioma , IDH-M and 1p/19q codeleted,WHO grade II | P                  | N | N     | Y       | N    |
| 010                  | 47  | M      | W    | N.H.      | Left frontotemporal            | GBM, IDH-WT, WHO grade IV                                   | R                  | Y | N     | N       | N    |
| 012                  | 30  | M      | W    | N.H.      | Left insula                    | GBM, IDH-M, WHO grade IV                                    | R                  | N | N     | N       | N    |
| 013                  | 73  | F      | W    | N.H.      | Right temporoparietal          | GBM, IDH-WT, WHO grade IV                                   | P                  | Y | N     | N       | N    |
| 014                  | 52  | F      | W    | N.H.      | Left parietal lobe             | GBM, IDH-WT, WHO grade IV                                   | P                  | Y | N     | N       | N    |
| 015                  | 33  | F      | W    | N.H.      | Right parietal lobe            | Oligodendroglioma , IDH-M,WHO grade II                      | P                  | N | N     | N       | N    |
| 016                  | 68  | M      | W    | N.H.      | Right frontal intra-axial      | Diffuse astrocytoma, IDH-M, WHO grade II                    | P                  | N | N     | N       | N    |
| 017                  | 38  | M      | W    | N.H.      | Left posterior frontal         | Diffuse glioma, IDH-M, WHO grade II                         | P                  | N | Y     | Y       | N    |
| 018                  | 25  | M      | M.R. | N.H.      | Left frontotemporal lobe       | Diffuse glioma, IDH-WT, WHO grade II                        | P                  | N | N     | N       | N    |
| 019                  | 39  | F      | W    | N.H.      | Left temporal lobe             | Anaplastic glioma, IDH-M, WHO grade III                     | R                  | N | N     | N       | N    |
| 020                  | 53  | F      | W    | H.        | Right parietal lobe; 2 nodules | GBM, IDH-WT, WHO grade IV                                   | P                  | Y | N     | N       | N    |
| 021                  | 45  | F      | W    | N.H.      | Left frontal lobe              | Diffuse glioma, IDH-M, WHO grade II                         | P                  | N | N     | N       | N    |
| 023                  | 63  | F      | W    | N.H.      | Left parietooccipital lobe     | GBM, IDH-WT, WHO grade IV                                   | P                  | N | N     | N       | Y    |
| 024                  | 58  | M      | W    | N.H.      | Right temporal lobe            | GBM and gliosarcoma, IDH wild-type, WHO grade IV            | P                  | N | N     | N       | N    |

Supplemental Table 3. Continued

|     |    |   |   |      |                                         |                                                      |   |   |   |   |   |
|-----|----|---|---|------|-----------------------------------------|------------------------------------------------------|---|---|---|---|---|
| 025 | 47 | F | W | N.H. | Right occipital lobe                    | GBM, IDH-WT, WHO grade IV                            | P | Y | N | N | N |
| 026 | 46 | F | W | N.H. | Right parietal lobe                     | Anaplastic astrocytoma, IDH-M, WHO grade III         | P | N | N | Y | N |
| 027 | 52 | F | W | N.H. | Left frontoparietal lobe                | Complex anaplastic astrocytoma, IDH-M, WHO grade III | P | N | Y | Y | N |
| 028 | 63 | M | W | N.H. | Right temporal lobe                     | Gliosarcoma, IDH-WT, WHO grade IV                    | R | N | N | N | N |
| 029 | 53 | F | W | N.H. | Right temporal lobe                     | Diffuse astrocytoma, IDH-WT, WHO grade II            | P | N | N | N | N |
| 030 | 38 | F | W | N.H. | Right frontal lobe                      | Diffuse astrocytoma, IDH-WT, WHO grade II            | P | N | N | N | Y |
| 031 | 68 | M | W | N.H. | Right parietal lobe                     | GBM, IDH-WT, WHO grade IV                            | P | N | N | N | N |
| 032 | 54 | F | W | N.H. | Left parietal lobe                      | GBM, IDH-WT, WHO grade IV                            | P | Y | Y | Y | N |
| 033 | 20 | M | W | N.H. | Left temporal lobe                      | Diffuse astrocytoma, IDH-M, WHO grade II             | P | N | N | N | Y |
| 034 | 66 | F | W | N.H. | Right temporal lobe                     | GBM, IDH-WT, WHO grade IV                            | P | N | N | N | N |
| 035 | 46 | M | B | A.A. | Right posterior frontal periventricular | GBM, IDH-WT, WHO grade IV                            | P | Y | N | N | N |
| 037 | 59 | M | W | N.H. | Bifrontal                               | GBM, IDH-WT, WHO grade IV                            | P | N | N | N | N |
| 038 | 23 | M | W | N.H. | Left frontal lobe                       | Anaplastic astrocytoma, IDH-mutant, WHO grade III    | P | N | N | N | N |
| 039 | 59 | M | W | N.H. | Left temporal lobe                      | GBM, IDH-WT, WHO grade IV                            | R | N | N | N | N |
| 040 | 57 | F | W | N.H. | Right frontal lobe                      | GBM, IDH-WT, WHO grade IV                            | P | N | N | N | N |
| 041 | 26 | F | W | N.H. | Right frontal lobe                      | Diffuse glioma, IDH-M                                | P | N | N | N | N |
| 042 | 35 | F | W | N.H. | Right frontal lobe                      | GBM, IDH-mutant, WHO grade IV                        | P | N | N | Y | N |
| 044 | 30 | M | W | N.H. | Left temporal lobe and insula           | Diffuse astrocytoma, IDH-M, WHO grade II             | R | N | N | N | N |
| 045 | 62 | F | W | N.H. | Right frontal lobe                      | GBM, IDH-WT, WHO grade IV                            | P | N | N | N | N |
| 046 | 66 | F | A | N.H. | Left temporal lobe                      | Diffuse glioma, IDH-WT                               | P | N | N | N | N |
| 047 | 48 | M | W | N.H. | Right frontal lobe                      | Anaplastic astrocytoma, IDH-mutant, WHO grade III    | P | N | N | Y | N |

**Supplemental Table 3. Continued**

|     |             |                     |                        |                  |                                  |                                                            |                      |   |   |   |   |   |
|-----|-------------|---------------------|------------------------|------------------|----------------------------------|------------------------------------------------------------|----------------------|---|---|---|---|---|
| 048 | 68          | M                   | W                      | N.H.             | Right frontal lobe               | GBM with granular cell features, IDH-WT, WHO grade IV      |                      | P | Y | N | N | N |
| 050 | 32          | F                   | W                      | N.H.             | Left insular and mesial temporal | Diffuse astrocytoma, IDH-M,WHO grade II                    |                      | P | N | N | N | Y |
| 051 | 30          | F                   | A.A.                   | N.H.             | Right frontal lobe               | GBM, IDH-M, WHO grade IV                                   |                      | R | N | N | N | N |
| 052 | 61          | M                   | W                      | N.H.             | Right temporal lobe              | GBM, IDH-WT, WHO grade IV                                  |                      | P | Y | N | N | N |
| 053 | 27          | M                   | A                      | N.H.             | Right temporal lobe and insula   | Diffuse astrocytoma, IDH-M,WHO grade II                    |                      | P | N | N | N | N |
| 054 | 68          | M                   | W                      | N.H.             | Right parietal-occipital lobe    | GBM, IDH-M, WHO grade IV                                   |                      | P | N | N | N | Y |
| 055 | 73          | M                   | W                      | N.H.             | Right frontal lobe               | GBM, IDH-WT, WHO grade IV                                  |                      | P | N | N | N | N |
| 056 | 35          | F                   | W                      | N.H.             | Left parietal lobe               | GBM, IDH-WT, WHO grade IV                                  |                      | P | N | N | N | N |
| 057 | 56          | F                   | W                      | N.H.             | Left frontal lobe                | Oligodendroglioma, IDH-M and 1p/19q codeleted,WHO grade II |                      | R | N | N | N | N |
| 058 | 26          | M                   | W                      | N.H.             | Right frontoparietal region      | Oligodendroglioma, IDH-M and 1p/19q codeleted,WHO grade II |                      | P | N | Y | Y | N |
|     | Average Age | Gender Balance      | Race Balance           | Hispanic Balance | Tumor Location Balance           | Tumor Grade and IDH status Balance                         |                      |   |   |   |   |   |
|     | 47.0        | 25 Males/24 Females | 43 W/ 3 B / 2 A / 1 MR | 1 H/ 48 NH       |                                  | 1 Grade I/ 17 Grade II/ 6 Grade III/ 25 Grade IV           | 23 IDH-M / 26 IDH-WT |   |   |   |   |   |

Race categories: W = White; N.H. = Non-Hispanic; B = Black; A = Asian; MR = multi-racial

GBM = Glioblastoma

Primary/Recurrent: P = Primary; R = Recurrent

F = Fluorescein

IMRI = Intraoperative MRI used (yes/no)

Mapping = Brain mapping used (yes/no)

Awake = Awake craniotomy (yes/no)

**Supplemental Table 4.** Additional histopathology results for the study subjects.

| Study subject number | GFAP        | ATRX | P53                                                                   | Ki67                                                               | 1p/19q | MGMT |
|----------------------|-------------|------|-----------------------------------------------------------------------|--------------------------------------------------------------------|--------|------|
| 001                  | 1           | 0    | 1 (20%)                                                               | 1 (1%)                                                             | 0      | --   |
| 002                  | -           | -    | -                                                                     | -                                                                  | -      | -    |
| 003                  | -           | -    | -                                                                     | -                                                                  | -      | -    |
| 004                  | -           | -    | -                                                                     | -                                                                  | -      | -    |
| 005                  | 1           | --   | --                                                                    | 1 (1-5%)                                                           | 0      | --   |
| 006                  | 1           | 0    | 1 (80%)                                                               | 1 (4%)                                                             | 0      | --   |
| 007                  | 1           | 1    | 1 (3%)                                                                | 1 (4%)                                                             | --     | 0    |
| 008                  | -           | -    | -                                                                     | -                                                                  | -      | -    |
| 009                  | 1           | 1    | 1 (<1%)                                                               | 1 (5%)                                                             | 1      | --   |
| 010                  | 1           | --   | --                                                                    | 1 (20%)                                                            | 0      | --   |
| 011                  | -           | -    | -                                                                     | -                                                                  | -      | -    |
| 012                  | 1           | 0    | 1                                                                     | 1                                                                  | 0      | 0    |
| 013                  | 1 (large %) | 0    | 1                                                                     | 1 (30%)                                                            | --     | 0    |
| 014                  | 1           | --   | 1 (40%)                                                               | 1 (30%)                                                            | --     | 0    |
| 015                  | 1           | 1    | 1                                                                     | 1 (< 5%)                                                           | 0      | --   |
| 016                  | 1           | 0    | 1 (<1%)                                                               | 1 (<1%)                                                            | 0      | --   |
| 017                  | 1           | 0    | 1 (40%)                                                               | 1 (3%)                                                             | --     | --   |
| 018                  | 1           | 0    | 1 (15%)                                                               | 1 (1-2%)                                                           | --     | --   |
| 019                  | 1           | 0    | 1 (75%)                                                               | 1 (40%)                                                            | --     | --   |
| 020                  | 1           | 1    | 1 (<10%)                                                              | 1 (30%)                                                            | 0      | 1    |
| 021                  | 0           | 1    | 1 (rare cells)                                                        | 1 (10%)                                                            | --     | --   |
| 022                  | -           | -    | -                                                                     | -                                                                  | -      | -    |
| 023                  | 1           | 1    | 1 (80%)                                                               | 1 (50%)                                                            | 0      | 1    |
| 024                  | 1           | 1    | 1 (scattered tumor cells) & 1 (<10% spindle cell and glial component) | 1 (5% spindle cell component) & 1 (40% of glial component)         | --     | --   |
| 025                  | 1           | 1    | 1 (<1%)                                                               | 1 (40%)                                                            | --     | 1    |
| 026                  | 1           | 0    | 1 (90%)                                                               | 1 (5%)                                                             | 0      | 1    |
| 027                  |             | 1    | 1 (<1%)                                                               | 1 (10% in anaplastic gliomatous component; <5% in remaining tumor) | 0      | --   |
| 028                  | 1           | --   | --                                                                    | 1 (20%)                                                            | 0      | 0    |
| 029                  | 1           | 1    | 1 (<1%)                                                               | 1 (1-2%)                                                           | --     | --   |
| 030                  | 1           | 2    | 1 (15-20%)                                                            | 1 (1-2%)                                                           | 0      | --   |

**Supplemental Table 4. Continued**

|     |    |                             |                                                 |                                                                 |    |      |
|-----|----|-----------------------------|-------------------------------------------------|-----------------------------------------------------------------|----|------|
| 031 | 1  | 1                           | 1 (<1%)                                         | 1 (approx. 50%)                                                 | -- | --   |
| 032 | 1  | 1                           | 1 (<5%)                                         | 1 (>60% in regions 1 ATRX1; as low as 10-15% in regions 0 ATRX) | -- | 1    |
| 033 | 1  | 2(partial loss of staining) | 1 (20%)                                         | 1 (10%)                                                         | 0  | --   |
| 034 | 1  | 1                           | 1 (10%)                                         | 1 (3-5%)                                                        | 0  | 1    |
| 035 | 1  | 1                           | 1 (10-15%) with faint staining                  | 1 (30%)                                                         | -- | 1    |
| 036 | -  | -                           | -                                               | -                                                               | -  | -    |
| 037 | 1  | 1                           | 1 (<5%)                                         | 1 (30%)                                                         | -- | --   |
| 038 | 1  | 0                           | 1 (>75%)                                        | 1 (up to 5-10%)                                                 | 0  | --   |
| 039 | 1  | --                          | --                                              | --                                                              | -- | --   |
| 040 | 1  | 0                           | 1 (25%)                                         | 1 (20%)                                                         | -- | 1    |
| 041 | 1  | 0                           | 1 (positive in the majority of the tumor cells) | 1 (approx. 5%)                                                  | -- | --   |
| 042 | 1  | 0                           | 1 (>80%)                                        | 1 (5%)                                                          | 0  | Ind. |
| 043 | -  | -                           | -                                               | -                                                               | -  | -    |
| 044 | 1  | 0                           | 1 (>95%)                                        | 1 (approx 3%)                                                   | 0  | --   |
| 045 | 1  | 0                           | 0                                               | 1 (50-75%)                                                      | 0  | --   |
| 046 | 1  | 1                           | 1 (<5%)                                         | 1 (5-10%) in most hypercellular regions                         | -- | --   |
| 047 | 1  | 0                           | 1 (>50%)                                        | 1 (approx. 3-5%)                                                | 0  | --   |
| 048 | 1  | 1                           | 1 (>50%)                                        | 1 (approx 10%)                                                  | -- | 0    |
| 049 | -  | -                           | -                                               | -                                                               | -  | -    |
| 050 | 1  | 0                           | 1 (40-50%)                                      | 1 (<3%)                                                         | -- | --   |
| 051 | 1  | --                          | 1 (>80%)                                        | --                                                              | -- | 1    |
| 052 | 1  | 0                           | 1 (<1%)                                         | 1 (5-10%)                                                       | -- | --   |
| 053 | 1  | --                          | 1 (30%)                                         | 1 (3-4%)                                                        | 0  | --   |
| 054 | -- | 1                           | 1                                               | --                                                              | -- | 0    |
| 055 | 1  | 1                           | 1 (<5%)                                         | 1 (40-50%)                                                      | -- | 1    |
| 056 | 1  | 1                           | 1 (20%)                                         | 1 (variably immunoreactive in up to 30% of tumor cells)         | 0  | 1    |
| 057 | 1  | --                          | --                                              | --                                                              | 1  | --   |
| 058 | 1  | 1                           | --                                              | 1(1%)                                                           | 1  | --   |

This table reports IHC staining results. 1 = immunoreactive; 0 = non-immunoreactive. For Ki-67, the percentage indicates the labelling index (percentage of tumor cells that are immunoreactive).

**Supplemental Table 5.** DESI-MS predictions of disease status and TCP for the smears obtained for each subject

| Sample Information |                    |             |                   |                   |                                               | Selected DESI-MS Scans |                    | PCA-LDA Diagnosis | NAA (Full-Scan) TCP Prediction |              | Lipid Deconvolution TCP Prediction |              | IDH Prediction from 2-HG |                |
|--------------------|--------------------|-------------|-------------------|-------------------|-----------------------------------------------|------------------------|--------------------|-------------------|--------------------------------|--------------|------------------------------------|--------------|--------------------------|----------------|
| Subject            | Biopsy # (Subject) | Core/Margin | Smear # (Subject) | Smear # (Overall) | Included/ Excluded in statistical predictions | # Lipid Scans          | # Metabolite Scans | Classification    | Mean TCP Value                 | TCP Category | Mean TCP Value                     | TCP Category | Normalized 2-HG Value    | IDH Prediction |
| 1                  | 1                  | Margin      | 1                 | 1                 | I                                             | 62                     | 81                 | G                 | 64                             | High         | 100                                | High         | N/A                      | N/A            |
|                    | 2                  | Margin      | 2                 | 2                 | E                                             | -                      | 120                | -                 | 91                             | High         | -                                  | -            | N/A                      | N/A            |
|                    | 3                  | Core        | 3                 | 3                 | I                                             | 74                     | 27                 | G                 | 81                             | High         | 100                                | High         | N/A                      | N/A            |
|                    | 4                  | Core        | 4                 | 4                 | I                                             | 72                     | 110                | G                 | 72                             | High         | 100                                | High         | N/A                      | N/A            |
|                    | 5                  | Margin      | 5                 | 5                 | I                                             | 28                     | 63                 | G                 | 82                             | High         | 98                                 | High         | N/A                      | N/A            |
|                    | 6                  | Core        | 6                 | 6                 | I                                             | 64                     | 95                 | G                 | 80                             | High         | 100                                | High         | N/A                      | N/A            |
|                    | 7                  | Core        | 7                 | 7                 | I                                             | 43                     | 112                | G                 | 70                             | High         | 100                                | High         | N/A                      | N/A            |
|                    | 8                  | Core        | 8                 | 8                 | I                                             | 55                     | 106                | G                 | 74                             | High         | 100                                | High         | N/A                      | N/A            |
|                    | 9                  | Margin      | 9                 | 9                 | E*                                            | 58                     | 94                 | G                 | 44                             | Low          | 100                                | High         | N/A                      | N/A            |
| 5                  | 1                  | N/A         | 1                 | 10                | I                                             | 13                     | 140                | G                 | 81                             | High         | 100                                | High         | N/A                      | N/A            |
|                    |                    | N/A         | 2                 | 11                | I                                             | 24                     | 115                | G                 | 72                             | High         | 100                                | High         | N/A                      | N/A            |
|                    | 2                  | Margin      | 3                 | 12                | I                                             | 38                     | 72                 | WM                | 55                             | High         | 32                                 | Low          | N/A                      | N/A            |
|                    | 3                  | Core        | 4                 | 13                | I                                             | 23                     | 60                 | G                 | 72                             | High         | 100                                | High         | N/A                      | N/A            |
|                    | 4                  | Margin      | 5                 | 14                | I                                             | 29                     | 109                | WM                | 66                             | High         | 52                                 | High         | N/A                      | N/A            |
|                    | 5                  | Margin      | 6                 | 15                | I                                             | 40                     | 93                 | WM                | 57                             | High         | 40                                 | Low          | N/A                      | N/A            |
|                    | 6                  | Margin      | 7                 | 16                | I                                             | 21                     | 79                 | G                 | 65                             | High         | 91                                 | High         | N/A                      | N/A            |
|                    | 7                  | Core        | 8                 | 17                | I                                             | 30                     | 137                | G                 | 79                             | High         | 100                                | High         | N/A                      | N/A            |

Supplemental Table 5. Continued

|   |      |        |    |    |    |     |     |    |     |      |     |      |     |     |
|---|------|--------|----|----|----|-----|-----|----|-----|------|-----|------|-----|-----|
| 6 | 1    | Core   | 1  | 18 | I  | 40  | 78  | WM | 63  | High | 18  | Low  | N/A | N/A |
|   | 2    | Core   | 2  | 19 | I  | 65  | 85  | G  | 74  | High | 97  | High | N/A | N/A |
|   | 3    | Margin | 3  | 20 | I  | 78  | 60  | WM | 14  | Low  | 77  | High | N/A | N/A |
|   | 4    | Core   | 4  | 21 | I  | 65  | 44  | WM | 63  | High | 48  | Low  | N/A | N/A |
|   | 5    | Core   | 5  | 22 | I  | 39  | 72  | WM | 58  | High | 52  | High | N/A | N/A |
|   |      | Core   | 6  | 23 | I  | 87  | 45  | WM | 55  | High | 30  | Low  | N/A | N/A |
| 6 | Core | 7      | 24 | I  | 99 | 53  | WM  | 26 | Low | 0    | Low | N/A  | N/A |     |
| 7 | 1    | Core   | 1  | 25 | I  | 92  | 121 | G  | 65  | High | 64  | High | N/A | N/A |
|   | 2    | Margin | 2  | 26 | I  | 125 | 127 | GM | 6   | Low  | 21  | Low  | N/A | N/A |
|   | 3    | Core   | 3  | 27 | I  | 125 | 120 | WM | 38  | Low  | 0   | Low  | N/A | N/A |
|   | 4    | Core   | 4  | 28 | I  | 80  | 86  | WM | 35  | Low  | 0   | Low  | N/A | N/A |
|   | 5    | Margin | 5  | 29 | I  | 87  | 91  | WM | 14  | Low  | 0   | Low  | N/A | N/A |
|   |      | Margin | 6  | 30 | I  | 98  | 93  | WM | 5   | Low  | 0   | Low  | N/A | N/A |
| 9 | 1    | N/A    | 1  | 31 | I  | 9   | 34  | G  | 57  | High | 74  | High | N/A | N/A |
|   |      | N/A    | 2  | 32 | I  | 37  | 41  | G  | 47  | Low  | 78  | High | N/A | N/A |
|   | 2    | Core   | 3  | 33 | I  | 124 | 127 | WM | 1   | Low  | 0   | Low  | N/A | N/A |
|   | 3    | Margin | 4  | 34 | I  | 111 | 120 | WM | 2   | Low  | 0   | Low  | N/A | N/A |
|   | 4    | Margin | 5  | 35 | I  | 92  | 65  | WM | 11  | Low  | 0   | Low  | N/A | N/A |
|   |      | Margin | 6  | 36 | I  | 105 | 90  | WM | 3   | Low  | 0   | Low  | N/A | N/A |
|   | 5    | Core   | 7  | 37 | I  | 117 | 109 | WM | 27  | Low  | 0   | Low  | N/A | N/A |
|   | 6    | Core   | 8  | 38 | I  | 61  | 84  | G  | 58  | High | 99  | High | N/A | N/A |
|   | 7    | Core   | 9  | 39 | I  | 72  | 72  | WM | 0   | Low  | 0   | Low  | N/A | N/A |

Supplemental Table 5. Continued

|    |   |        |   |    |    |     |     |    |    |      |     |      |     |     |
|----|---|--------|---|----|----|-----|-----|----|----|------|-----|------|-----|-----|
| 10 | 1 | Core   | 1 | 40 | I  | 48  | 109 | GM | 28 | Low  | 0   | Low  | N/A | N/A |
|    | 2 | Core   | 2 | 41 | I  | 120 | 106 | G  | 25 | Low  | 68  | High | N/A | N/A |
|    | 3 | Core   | 3 | 42 | I  | 55  | 93  | G  | 49 | Low  | 98  | High | N/A | N/A |
|    | 4 | Core   | 4 | 43 | I  | 94  | 129 | G  | 62 | High | 96  | High | N/A | N/A |
|    |   | Core   | 5 | 44 | I  | 70  | 96  | G  | 40 | Low  | 74  | High | N/A | N/A |
|    | 5 | Margin | 6 | 45 | I  | 48  | 65  | G  | 48 | Low  | 98  | High | N/A | N/A |
| 12 | 1 | Core   | 1 | 47 | I  | 42  | 83  | G  | 76 | High | 100 | High | N/A | N/A |
|    |   | Core   | 2 | 48 | I  | 50  | 121 | G  | 78 | High | 100 | High | N/A | N/A |
|    | 2 | Core   | 3 | 49 | I  | 52  | 87  | G  | 48 | Low  | 65  | High | N/A | N/A |
|    | 3 | Core   | 4 | 50 | I  | 62  | 107 | G  | 71 | High | 91  | High | N/A | N/A |
|    | 4 | N/A    | 5 | 51 | I  | 45  | 92  | G  | 48 | Low  | 82  | High | N/A | N/A |
|    | 5 | N/A    | 6 | 52 | I  | 53  | 93  | WM | 66 | High | 50  | Low  | N/A | N/A |
|    | 6 | N/A    | 7 | 53 | I  | 43  | 95  | WM | 58 | High | 50  | Low  | N/A | N/A |
|    | 7 | N/A    | 8 | 54 | I  | 47  | 89  | WM | 63 | High | 26  | Low  | N/A | N/A |
| 13 | 1 | Margin | 1 | 55 | I  | 22  | 20  | G  | 76 | High | 83  | High | N/A | N/A |
|    |   | Margin | 2 | 56 | I  | 12  | 22  | G  | 85 | High | 87  | High | N/A | N/A |
|    | 2 | Core   | 3 | 57 | I  | 20  | 23  | G  | 81 | High | 92  | High | N/A | N/A |
|    |   | Core   | 4 | 58 | I  | 24  | 25  | G  | 80 | High | 87  | High | N/A | N/A |
|    | 3 | Margin | 5 | 59 | E* | 19  | 22  | WM | 78 | High | 47  | Low  | N/A | N/A |
|    |   | Margin | 6 | 60 | I  | 27  | 23  | WM | 65 | High | 32  | Low  | N/A | N/A |

Supplemental Table 5. Continued

|    |   |        |    |    |    |    |    |    |    |      |     |      |     |     |
|----|---|--------|----|----|----|----|----|----|----|------|-----|------|-----|-----|
| 13 | 4 | Margin | 7  | 61 | E* | 12 | -  | -  | -  | -    | 21  | Low  | N/A | N/A |
|    | 5 | Margin | 8  | 62 | E* | 11 | -  | -  | -  | -    | 8   | Low  | N/A | N/A |
|    | 6 | Margin | 9  | 63 | E  | 18 | -  | -  | -  | -    | 1   | Low  | N/A | N/A |
|    | 7 | Margin | 10 | 64 | I  | 4  | 25 | WM | 49 | Low  | 0   | Low  | N/A | N/A |
| 14 | 1 | Margin | 1  | 65 | E  | -  | -  | -  | -  | -    | -   | -    | N/A | N/A |
|    | 2 | Core   | 2  | 66 | E* | 24 | 17 | WM | 30 | Low  | 21  | Low  | N/A | N/A |
|    | 3 | Margin | 3  | 67 | E  | -  | -  | -  | -  | -    | -   | -    | N/A | N/A |
|    |   | Margin | 4  | 68 | E* | 14 | 22 | G  | 79 | High | 98  | High | N/A | N/A |
|    | 4 | Core   | 5  | 69 | I  | 9  | 24 | G  | 88 | High | 97  | High | N/A | N/A |
|    | 5 | Core   | 6  | 70 | I  | 24 | 25 | G  | 91 | High | 99  | High | N/A | N/A |
|    | 6 | Margin | 7  | 71 | I  | 5  | 24 | G  | 88 | High | 100 | High | N/A | N/A |
|    |   | Margin | 8  | 72 | I  | 15 | 25 | G  | 86 | High | 100 | High | N/A | N/A |
| 15 | 1 | Core   | 1  | 73 | I  | 5  | 18 | G  | 74 | High | 78  | High | N/A | N/A |
|    |   | Core   | 2  | 74 | I  | 7  | 24 | G  | 79 | High | 100 | High | N/A | N/A |
|    | 2 | Core   | 3  | 75 | I  | 5  | 23 | G  | 81 | High | 79  | High | N/A | N/A |
|    |   | Core   | 4  | 76 | I  | 14 | 22 | G  | 75 | High | 80  | High | N/A | N/A |
|    | 3 | Core   | 5  | 77 | I  | 5  | 25 | G  | 85 | High | 87  | High | N/A | N/A |
|    | 4 | Margin | 6  | 78 | I  | 33 | 21 | G  | 40 | Low  | 87  | High | N/A | N/A |
|    |   | Margin | 7  | 79 | I  | 43 | 25 | WM | 7  | Low  | 3   | Low  | N/A | N/A |

Supplemental Table 5. Continued

|    |   |        |   |    |    |    |    |    |    |      |    |      |     |     |
|----|---|--------|---|----|----|----|----|----|----|------|----|------|-----|-----|
| 15 | 5 | Margin | 8 | 80 | I  | 18 | 23 | WM | 69 | High | 13 | Low  | N/A | N/A |
|    | 6 | Margin | 9 | 81 | I  | 28 | 24 | WM | 48 | Low  | 0  | Low  | N/A | N/A |
| 16 | 1 | Core   | 1 | 82 | I  | 14 | 15 | WM | 1  | Low  | 0  | Low  | N/A | N/A |
|    | 2 | Core   | 2 | 83 | I  | 9  | 22 | G  | 21 | Low  | 78 | High | N/A | N/A |
|    | 3 | Core   | 3 | 84 | I  | 26 | 25 | WM | 43 | Low  | 29 | Low  | N/A | N/A |
|    | 4 | Margin | 4 | 85 | I  | 24 | 18 | WM | 54 | High | 17 | Low  | N/A | N/A |
|    | 5 | Margin | 5 | 86 | I  | 28 | 25 | WM | 41 | Low  | 17 | Low  | N/A | N/A |
|    | 6 | Margin | 6 | 87 | I  | 25 | 21 | WM | 23 | Low  | 0  | Low  | N/A | N/A |
|    | 7 | Core   | 7 | 88 | E  | 21 | -  | -  | -  | -    | 33 | Low  | N/A | N/A |
| 17 | 1 | Core   | 1 | 89 | I  | 8  | 20 | G  | 68 | High | 89 | High | N/A | N/A |
|    | 2 | Core   | 2 | 90 | I  | 15 | 25 | WM | 71 | High | 54 | High | N/A | N/A |
|    | 3 | Core   | 3 | 91 | I  | 32 | 25 | WM | 69 | High | 23 | Low  | N/A | N/A |
|    | 4 | Margin | 4 | 92 | I  | 32 | 17 | WM | 52 | High | 28 | Low  | N/A | N/A |
| 18 | 1 | Core   | 1 | 93 | E* | 20 | 25 | G  | 88 | High | 92 | High | N/A | N/A |
|    |   | Core   | 2 | 94 | E* | 23 | 23 | G  | 88 | High | 91 | High | N/A | N/A |
|    | 2 | Core   | 3 | 95 | I  | 20 | 25 | WM | 84 | High | 58 | High | N/A | N/A |
|    | 3 | Core   | 4 | 96 | I  | 27 | 25 | WM | 89 | High | 68 | High | N/A | N/A |
|    | 4 | Margin | 5 | 97 | I  | 23 | 10 | WM | 11 | Low  | 16 | Low  | N/A | N/A |
|    |   | Margin | 6 | 98 | I  | 32 | 19 | WM | 26 | Low  | 14 | Low  | N/A | N/A |
|    | 5 | Core   | 7 | 99 | I  | 23 | 25 | WM | 80 | High | 33 | Low  | N/A | N/A |

Supplemental Table 5. Continued

|    |   |        |    |     |    |    |    |    |    |      |    |      |     |     |
|----|---|--------|----|-----|----|----|----|----|----|------|----|------|-----|-----|
| 18 | 5 | Core   | 8  | 100 | I  | 28 | 25 | WM | 76 | High | 30 | Low  | N/A | N/A |
| 19 | 1 | Core   | 1  | 101 | I  | 27 | 24 | G  | 85 | High | 94 | High | N/A | N/A |
|    | 2 | Margin | 2  | 102 | E* | 24 | 25 | WM | 80 | High | 45 | Low  | N/A | N/A |
|    | 3 | Core   | 3  | 103 | E  | -  | 25 | -  | 88 | High | -  | -    | N/A | N/A |
|    |   | Core   | 4  | 104 | I  | 23 | 25 | G  | 90 | High | 96 | High | N/A | N/A |
|    | 4 | Core   | 5  | 105 | I  | 14 | 25 | G  | 89 | High | 92 | High | N/A | N/A |
|    | 5 | Margin | 6  | 106 | I  | 23 | 25 | GM | 26 | Low  | 0  | Low  | N/A | N/A |
|    |   | Margin | 7  | 107 | I  | 24 | 25 | GM | 26 | Low  | 2  | Low  | N/A | N/A |
|    | 6 | Margin | 8  | 108 | I  | 25 | 25 | WM | 52 | High | 0  | Low  | N/A | N/A |
|    | 7 | Margin | 9  | 109 | I  | 13 | 25 | WM | 68 | High | 43 | Low  | N/A | N/A |
|    |   | Margin | 10 | 110 | I  | 28 | 25 | WM | 36 | High | 3  | Low  | N/A | N/A |
| 20 | 1 | Margin | 1  | 111 | I  | 13 | 25 | WM | 72 | High | 40 | Low  | N/A | N/A |
|    |   | Margin | 2  | 112 | I  | 30 | 25 | WM | 62 | High | 38 | Low  | N/A | N/A |
|    | 2 | Margin | 3  | 113 | I  | 30 | 25 | WM | 70 | High | 59 | High | N/A | N/A |
|    |   | Margin | 4  | 114 | I  | 31 | 25 | WM | 56 | High | 38 | Low  | N/A | N/A |
|    | 3 | Margin | 5  | 115 | I  | 32 | 25 | WM | 22 | Low  | 0  | Low  | N/A | N/A |
|    | 4 | Margin | 6  | 116 | I  | 33 | 25 | G  | 72 | High | 83 | High | N/A | N/A |
|    | 5 | Margin | 7  | 117 | I  | 27 | 25 | WM | 31 | Low  | 0  | Low  | N/A | N/A |

Supplemental Table 5. Continued

|    |   |        |    |     |    |    |    |    |    |      |    |      |     |     |
|----|---|--------|----|-----|----|----|----|----|----|------|----|------|-----|-----|
| 20 | 5 | Margin | 8  | 118 | I  | 33 | 25 | WM | 12 | Low  | 0  | Low  | N/A | N/A |
| 21 | 1 | Margin | 1  | 119 | I  | 8  | 25 | G  | 32 | Low  | 64 | High | N/A | N/A |
|    |   | Margin | 2  | 120 | I  | 18 | 25 | G  | 24 | Low  | 69 | High | N/A | N/A |
|    | 2 | Core   | 3  | 121 | I  | 30 | 22 | GM | 17 | Low  | 57 | High | N/A | N/A |
|    |   | Core   | 4  | 122 | I  | 20 | 25 | GM | 12 | Low  | 50 | Low  | N/A | N/A |
|    | 3 | N/A    | 5  | 123 | I  | 26 | 25 | GM | 24 | Low  | 70 | High | N/A | N/A |
|    |   | N/A    | 6  | 124 | I  | 27 | 25 | GM | 25 | Low  | 70 | High | N/A | N/A |
|    | 4 | Core   | 7  | 125 | I  | 29 | 22 | WM | 32 | Low  | 40 | Low  | N/A | N/A |
|    |   | Core   | 8  | 126 | I  | 30 | 24 | G  | 37 | Low  | 68 | High | N/A | N/A |
|    | 5 | Margin | 9  | 127 | I  | 24 | 22 | GM | 18 | Low  | 36 | Low  | N/A | N/A |
|    | 6 | Margin | 10 | 128 | I  | 30 | 21 | WM | 33 | Low  | 11 | Low  | N/A | N/A |
| 23 | 1 | Core   | 1  | 129 | E* | 3  | 25 | G  | 71 | High | 83 | High | N/A | N/A |
|    | 2 | Core   | 2  | 130 | I  | 2  | 25 | WM | 70 | High | 88 | High | N/A | N/A |
|    |   | Core   | 3  | 131 | E* | 32 | 25 | WM | 75 | High | 23 | Low  | N/A | N/A |
|    | 3 | Core   | 4  | 132 | I  | 32 | 25 | WM | 69 | High | 47 | Low  | N/A | N/A |
|    |   | Core   | 5  | 133 | I  | 32 | 25 | WM | 76 | High | 54 | High | N/A | N/A |
|    | 1 | Core   | 6  | 134 | E  | -  | 25 | -  | 79 | High | -  | -    | N/A | N/A |
|    |   | Core   | 7  | 135 | E  | -  | 25 | -  | 83 | High | -  | -    | N/A | N/A |
|    | 4 | Core   | 8  | 136 | I  | 18 | 25 | G  | 82 | High | 83 | High | N/A | N/A |
|    |   | Core   | 9  | 137 | I  | 10 | 25 | G  | 80 | High | 81 | High | N/A | N/A |
| 24 | 1 | Margin | 1  | 138 | I  | 17 | 25 | G  | 75 | High | 84 | High | 5.4 | WT  |
|    |   | Margin | 2  | 139 | I  | 23 | 25 | G  | 75 | High | 83 | High | 0   | WT  |

**Supplemental Table 5. Continued**

[illegible]

**Supplemental Table 5. Continued**

[illegible]

Supplemental Table 5. Continued

|    |   |        |    |     |   |    |    |    |    |      |    |      |      |     |
|----|---|--------|----|-----|---|----|----|----|----|------|----|------|------|-----|
| 29 | 4 | Core   | 6  | 179 | I | 30 | 26 | WM | 24 | Low  | 0  | Low  | 0    | WT  |
|    | 5 | Core   | 7  | 180 | I | 30 | 25 | WM | 50 | Low  | 49 | Low  | 21.9 | WT  |
|    | 6 | Margin | 8  | 181 | I | 19 | 25 | WM | 61 | High | 51 | High | 0    | WT  |
|    |   | Margin | 9  | 182 | I | 29 | 25 | WM | 58 | High | 31 | Low  | 14.1 | WT  |
|    |   | Core   | 10 | 183 | I | 27 | 17 | WM | 46 | Low  | 35 | Low  | 0    | WT  |
| 30 | 1 | Core   | 1  | 184 | I | 28 | 26 | WM | 55 | High | 8  | Low  | 57.1 | WT  |
|    |   | Core   | 2  | 185 | I | 25 | 15 | WM | 60 | High | 46 | Low  | 36.9 | WT  |
|    | 2 | Margin | 3  | 186 | I | 34 | 22 | WM | 1  | Low  | 0  | Low  | 12.6 | WT  |
|    | 3 | Margin | 4  | 187 | I | 36 | 28 | WM | 1  | Low  | 0  | Low  | 0    | WT  |
|    | 4 | Margin | 5  | 188 | I | 19 | 15 | WM | 7  | Low  | 0  | Low  | 56.2 | WT  |
|    | 5 | Margin | 6  | 189 | I | 18 | 29 | GM | 1  | Low  | 0  | Low  | 26.5 | WT  |
| 31 | 1 | Margin | 1  | 190 | I | 14 | 29 | G  | 79 | High | 72 | High | 0    | WT  |
|    |   | Margin | 2  | 191 | I | 22 | 29 | GM | 80 | High | 66 | High | 4.6  | WT  |
|    | 2 | Core   | 3  | 192 | E | -  | -  | -  | -  | -    | -  | -    | 0    | WT  |
|    | 3 | Margin | 4  | 193 | I | 27 | 29 | WM | 46 | Low  | 8  | Low  | 0    | WT  |
|    | 4 | Core   | 5  | 194 | E | -  | -  | -  | -  | -    | -  | -    | 0    | WT  |
|    | 5 | Core   | 6  | 195 | I | 12 | 12 | WM | 50 | Low  | 0  | Low  | 0    | WT  |
| 32 | 1 | Margin | 1  | 196 | I | 18 | 25 | WM | 9  | Low  | 0  | Low  | 0    | WT  |
|    | 2 | Core   | 2  | 197 | I | 20 | 26 | WM | 44 | Low  | 13 | Low  | 0    | WT  |
|    |   | Core   | 3  | 198 | I | 25 | 16 | WM | 31 | Low  | 0  | Low  | N/A  | N/A |

Supplemental Table 5. Continued

|    |   |        |   |     |   |    |    |    |    |      |    |     |      |     |
|----|---|--------|---|-----|---|----|----|----|----|------|----|-----|------|-----|
| 32 | 3 | Margin | 4 | 199 | I | 27 | 20 | WM | 48 | Low  | 0  | Low | N/A  | N/A |
|    | 4 | Margin | 5 | 200 | I | 20 | 19 | WM | 44 | Low  | 0  | Low | N/A  | N/A |
|    | 5 | Core   | 6 | 201 | I | 7  | 13 | WM | 37 | Low  | 0  | Low | 0    | WT  |
|    |   | Core   | 7 | 202 | I | 17 | 8  | WM | 40 | Low  | 2  | Low | 0    | WT  |
| 33 | 1 | Margin | 1 | 203 | I | 7  | 21 | WM | 55 | High | 30 | Low | N/A  | N/A |
|    | 2 | Margin | 2 | 204 | E | -  | -  | -  | -  | -    | -  | -   | 5.5  | WT  |
|    | 3 | Margin | 3 | 205 | E | -  | -  | -  | -  | -    | -  | -   | 59.7 | WT  |
|    | 4 | Core   | 4 | 206 | I | 14 | 27 | WM | 77 | High | 21 | Low | 87.6 | Mut |
|    | 5 | Core   | 5 | 207 | E | -  | -  | -  | -  | -    | -  | -   | 43.8 | WT  |
|    | 6 | Core   | 6 | 208 | E | -  | -  | -  | -  | -    | -  | -   | 71.4 | Mut |
| 34 | 1 | Margin | 1 | 209 | I | 21 | 19 | GM | 13 | Low  | 0  | Low | 4.3  | WT  |
|    |   | Margin | 2 | 210 | I | 29 | 23 | GM | 17 | Low  | 0  | Low | 3    | WT  |
|    | 2 | Core   | 3 | 211 | I | 24 | 24 | WM | 59 | High | 10 | Low | 9.3  | WT  |
|    |   | Core   | 4 | 212 | I | 16 | 21 | WM | 59 | High | 1  | Low | 0    | WT  |
|    | 3 | Core   | 5 | 213 | I | 9  | 22 | WM | 57 | High | 0  | Low | 0    | WT  |
|    |   | Core   | 6 | 214 | I | 13 | 23 | WM | 52 | High | 0  | Low | 10.5 | WT  |
| 35 | 1 | Core   | 1 | 215 | I | 23 | 8  | WM | 29 | Low  | 0  | Low | 0    | WT  |
|    | 2 | Margin | 2 | 216 | E | -  | -  | -  | -  | -    | -  | -   | 22.4 | WT  |
|    | 3 | Margin | 3 | 217 | E | 12 | -  | -  | -  | -    | 11 | Low | 0    | WT  |
|    | 4 | Margin | 4 | 218 | E | 20 | -  | -  | -  | -    | 0  | Low | 0    | WT  |

Supplemental Table 5. Continued

|    |   |        |   |     |   |    |    |    |    |      |     |      |       |     |
|----|---|--------|---|-----|---|----|----|----|----|------|-----|------|-------|-----|
| 35 | 5 | Margin | 5 | 219 | E | 9  | -  | -  | -  | -    | 9   | Low  | 0     | WT  |
|    | 6 | Margin | 6 | 220 | E | -  | -  | -  | -  | -    | -   | -    | 12.9  | WT  |
| 37 | 1 | Core   | 1 | 221 | I | 10 | 16 | G  | 84 | High | 71  | High | 0     | WT  |
|    |   | Core   | 2 | 222 | I | 7  | 16 | G  | 85 | High | 70  | High | 0     | WT  |
|    | 2 | Core   | 3 | 223 | I | 9  | 22 | G  | 85 | High | 99  | High | 0     | WT  |
|    | 3 | Core   | 4 | 224 | I | 8  | 23 | G  | 81 | High | 92  | High | 0     | WT  |
|    | 4 | Core   | 5 | 225 | I | 12 | 7  | G  | 77 | High | 73  | High | 0     | WT  |
| 38 | 1 | Core   | 1 | 226 | I | 6  | 29 | G  | 87 | High | 100 | High | 33.5  | WT  |
|    | 2 | Core   | 2 | 227 | I | 4  | 28 | G  | 75 | High | 89  | High | N/A   | N/A |
|    | 3 | Core   | 3 | 228 | I | 28 | 27 | WM | 40 | Low  | 0   | Low  | 101.7 | Mut |
|    | 4 | Margin | 4 | 229 | I | 7  | 22 | WM | 65 | High | 56  | High | N/A   | N/A |
|    | 5 | Margin | 5 | 230 | I | 23 | 22 | WM | 78 | High | 36  | Low  | 15.1  | WT  |
|    | 6 | Core   | 6 | 231 | I | 22 | 25 | WM | 84 | High | 54  | High | 73.5  | Mut |
| 39 | 1 | Margin | 1 | 232 | I | 50 | 46 | WM | 17 | Low  | 6   | Low  | 38.3  | WT  |
|    | 2 | Margin | 2 | 233 | I | 62 | 64 | WM | 30 | Low  | 0   | Low  | 16.3  | WT  |
|    | 3 | Core   | 3 | 234 | I | 67 | 66 | WM | 38 | Low  | 0   | Low  | 19.7  | WT  |
| 40 | 1 | Margin | 1 | 235 | E | -  | 60 | -  | 79 | High | -   | -    | 32.9  | WT  |
|    |   | Margin | 2 | 236 | E | -  | 60 | -  | 82 | High | -   | -    | 0     | WT  |
|    | 2 | Core   | 3 | 237 | I | 24 | 62 | G  | 76 | High | 93  | High | 15.1  | WT  |
|    |   | Core   | 4 | 238 | I | 33 | 65 | G  | 65 | High | 84  | High | 44.3  | WT  |

Supplemental Table 5. Continued

|    |   |        |    |     |    |    |    |    |    |      |    |      |       |     |
|----|---|--------|----|-----|----|----|----|----|----|------|----|------|-------|-----|
| 40 | 3 | Margin | 5  | 239 | I  | 64 | 67 | WM | 19 | Low  | 0  | Low  | 65.6  | WT  |
|    |   | Margin | 6  | 240 | I  | 64 | 65 | WM | 22 | Low  | 0  | Low  | 17.3  | WT  |
| 41 | 1 | Margin | 1  | 241 | I  | 49 | 64 | WM | 37 | Low  | 22 | Low  | 90.2  | Mut |
|    | 2 | Margin | 2  | 242 | I  | 64 | 61 | WM | 7  | Low  | 0  | Low  | N/A   | N/A |
|    | 3 | Margin | 3  | 243 | I  | 53 | 65 | G  | 19 | Low  | 71 | High | 26.1  | WT  |
|    | 4 | Margin | 4  | 244 | I  | 53 | 49 | WM | 20 | Low  | 71 | High | 10.1  | WT  |
|    | 5 | Margin | 5  | 245 | I  | 38 | 37 | WM | 57 | High | 53 | High | N/A   | N/A |
| 42 | 1 | Core   | 1  | 246 | E* | 21 | 59 | G  | 89 | High | 86 | High | 71    | Mut |
|    | 2 | Core   | 2  | 247 | I  | 20 | 64 | WM | 71 | High | 50 | Low  | 180.3 | Mut |
|    | 3 | Core   | 3  | 248 | E* | 37 | 64 | WM | 74 | High | 39 | Low  | 88.9  | Mut |
| 44 | 1 | Core   | 1  | 249 | I  | 20 | 64 | G  | 95 | High | 94 | High | 70.5  | Mut |
|    |   | Core   | 2  | 250 | I  | 9  | 64 | G  | 91 | High | 91 | High | 91.3  | Mut |
|    |   | Core   | 3  | 251 | I  | 22 | 63 | G  | 96 | High | 88 | High | 97.4  | Mut |
|    | 2 | Core   | 4  | 252 | I  | 39 | 63 | G  | 89 | High | 83 | High | 76.4  | Mut |
|    | 3 | Margin | 5  | 253 | I  | 26 | 63 | G  | 80 | High | 93 | High | 78.1  | Mut |
|    |   | Margin | 6  | 254 | I  | 18 | 63 | G  | 81 | High | 92 | High | 80.7  | Mut |
|    | 4 | Margin | 7  | 255 | I  | 60 | 64 | G  | 97 | High | 83 | High | 83.4  | Mut |
|    | 5 | Margin | 8  | 256 | I  | 46 | 65 | GM | 8  | Low  | 50 | Low  | 79.3  | Mut |
|    | 6 | Core   | 9  | 257 | I  | 36 | 65 | G  | 66 | High | 89 | High | 94.7  | Mut |
|    |   | Core   | 10 | 258 | I  | 49 | 65 | G  | 26 | Low  | 78 | High | 76.7  | Mut |

Supplemental Table 5. Continued

|    |   |        |   |     |    |    |    |    |    |      |    |      |       |     |
|----|---|--------|---|-----|----|----|----|----|----|------|----|------|-------|-----|
| 45 | 1 | N/A    | 1 | 259 | E* | 59 | 65 | G  | 83 | High | 89 | High | N/A   | N/A |
| 46 | 1 | Core   | 1 | 260 | I  | 36 | 64 | G  | 70 | High | 75 | High | 48.5  | WT  |
|    |   | Core   | 2 | 261 | I  | 31 | 64 | G  | 62 | High | 85 | High | 69    | WT  |
|    | 2 | Core   | 3 | 262 | I  | 33 | 65 | G  | 68 | High | 68 | High | 4.9   | WT  |
|    | 3 | Core   | 4 | 263 | I  | 29 | 65 | G  | 61 | High | 87 | High | 15.3  | WT  |
|    |   | Core   | 5 | 264 | I  | 31 | 66 | G  | 62 | High | 83 | High | 78.7  | Mut |
|    |   | Core   | 6 | 265 | I  | 39 | 64 | G  | 59 | High | 79 | High | 27.7  | WT  |
|    | 4 | Margin | 7 | 266 | I  | 38 | 62 | G  | 56 | High | 49 | Low  | 40.6  | WT  |
|    | 5 | Margin | 8 | 267 | I  | 30 | 64 | G  | 59 | High | 68 | High | 29    | WT  |
|    | 6 | Margin | 9 | 268 | I  | 60 | 65 | WM | 29 | Low  | 10 | Low  | 56.1  | WT  |
| 47 | 1 | Core   | 1 | 269 | I  | 63 | 60 | WM | 45 | Low  | 33 | Low  | 41.1  | WT  |
|    |   | Core   | 2 | 270 | I  | 66 | 62 | WM | 40 | Low  | 33 | Low  | 53.3  | WT  |
|    | 2 | Core   | 3 | 271 | I  | 49 | 63 | G  | 92 | High | 85 | High | 82.7  | Mut |
|    |   | Core   | 4 | 272 | I  | 52 | 61 | G  | 79 | High | 73 | High | 131.9 | Mut |
|    | 3 | Core   | 5 | 273 | I  | 55 | 57 | G  | 33 | Low  | 56 | High | 91.1  | Mut |
|    |   | Core   | 6 | 274 | I  | 53 | 59 | G  | 37 | Low  | 64 | High | 83.4  | Mut |
|    | 4 | Margin | 7 | 275 | I  | 57 | 61 | G  | 57 | High | 38 | Low  | 77.8  | Mut |
|    |   | Margin | 8 | 276 | I  | 62 | 63 | WM | 46 | Low  | 28 | Low  | 63.1  | WT  |
| 48 | 1 | Core   | 1 | 277 | I  | 26 | 48 | WM | 43 | Low  | 25 | Low  | 0     | WT  |
|    |   | Core   | 2 | 278 | I  | 18 | 58 | G  | 30 | Low  | 71 | High | 16.8  | WT  |
|    | 2 | Core   | 3 | 279 | I  | 19 | 63 | WM | 64 | High | 19 | Low  | 14.3  | WT  |
|    |   | Core   | 4 | 280 | I  | 2  | 60 | WM | 81 | High | 11 | Low  | 46.8  | WT  |
|    | 3 | Core   | 5 | 281 | I  | 62 | 64 | WM | 28 | Low  | 16 | Low  | 28.3  | WT  |

Supplemental Table 5. Continued

|    |   |        |   |     |    |    |    |    |     |      |    |      |       |      |
|----|---|--------|---|-----|----|----|----|----|-----|------|----|------|-------|------|
| 48 | 3 | Core   | 6 | 282 | I  | 60 | 63 | WM | 30  | Low  | 10 | Low  | 9.6   | 9.6  |
|    |   | Core   | 7 | 283 | I  | 63 | 65 | WM | 26  | Low  | 6  | Low  | 10.8  | 10.8 |
| 50 | 1 | Core   | 1 | 284 | I  | 70 | 75 | WM | 52  | High | 12 | Low  | 106.7 | Mut  |
|    | 2 | Margin | 2 | 285 | I  | 73 | 77 | WM | 4   | Low  | 25 | Low  | 62.8  | WT   |
|    | 3 | Core   | 3 | 286 | I  | 75 | 74 | WM | 51  | High | 9  | Low  | 154.5 | Mut  |
|    | 4 | Core   | 4 | 287 | I  | 62 | 74 | G  | 17  | Low  | 54 | High | 116.9 | Mut  |
|    | 5 | Core   | 5 | 288 | I  | 41 | 72 | WM | 84  | High | 36 | Low  | 76.9  | Mut  |
|    | 6 | Core   | 6 | 289 | I  | 69 | 73 | WM | 54  | High | 32 | Low  | 89.8  | Mut  |
| 51 | 1 | Core   | 1 | 290 | I  | 6  | 71 | G  | 100 | High | 72 | High | 393.9 | Mut  |
|    | 2 | Margin | 2 | 291 | E* | 11 | 73 | G  | 82  | High | 75 | High | 466.2 | Mut  |
|    | 3 | Margin | 3 | 292 | E* | 2  | 72 | G  | 83  | High | 89 | High | 631.8 | Mut  |
|    | 4 | Core   | 4 | 293 | E* | 2  | 69 | G  | 94  | High | 84 | High | 657.6 | Mut  |
|    | 5 | Margin | 5 | 294 | E* | 9  | 72 | G  | 71  | High | 83 | High | 683.8 | Mut  |
|    | 6 | Core   | 6 | 295 | E* | 15 | 73 | G  | 90  | High | 81 | High | 524.1 | Mut  |
| 52 | 1 | Margin | 1 | 296 | I  | 50 | 41 | GM | 43  | Low  | 27 | Low  | 0     | WT   |
|    | 2 | Margin | 2 | 297 | I  | 61 | 42 | WM | 38  | Low  | 17 | Low  | 28.6  | WT   |
|    | 3 | Core   | 3 | 298 | E* | 23 | 39 | G  | 96  | High | 58 | High | 53.2  | WT   |
|    |   | Core   | 4 | 299 | I  | 60 | 41 | G  | 96  | High | 35 | Low  | N/A   | N/A  |
| 53 | 1 | Core   | 1 | 300 | I  | 60 | 41 | WM | 59  | High | 20 | Low  | 113.1 | Mut  |
|    | 2 | Margin | 2 | 301 | I  | 54 | 44 | WM | 36  | Low  | 25 | Low  | 179.6 | Mut  |
|    |   | Margin | 3 | 302 | I  | 68 | 41 | WM | 49  | Low  | 16 | Low  | 109.3 | Mut  |

Supplemental Table 5. Continued

|    |   |        |   |     |    |    |    |    |     |      |    |      |       |     |
|----|---|--------|---|-----|----|----|----|----|-----|------|----|------|-------|-----|
| 53 | 3 | Core   | 4 | 303 | I  | 57 | 44 | G  | 45  | Low  | 55 | High | 95.5  | Mut |
|    |   | Core   | 5 | 304 | I  | 37 | 44 | G  | 46  | Low  | 76 | High | 185.2 | Mut |
|    | 4 | Core   | 6 | 305 | I  | 58 | 43 | WM | 65  | High | 20 | Low  | 135.9 | Mut |
|    | 5 | Core   | 7 | 306 | I  | 55 | 43 | WM | 65  | High | 26 | Low  | 195.3 | Mut |
|    | 6 | Margin | 8 | 307 | I  | 32 | 40 | G  | 67  | High | 63 | High | 43    | WT  |
|    |   | Margin | 9 | 308 | I  | 40 | 43 | G  | 52  | High | 49 | Low  | 57.3  | WT  |
| 54 | 1 | Margin | 1 | 309 | E  | -  | -  | -  | -   | -    | -  | -    | N/A   | N/A |
|    |   | Margin | 2 | 310 | E  | -  | -  | -  | -   | -    | -  | -    | 97.5  | Mut |
|    | 2 | Core   | 3 | 311 | I  | 16 | 75 | WM | 57  | High | 25 | Low  | 78.4  | Mut |
|    |   | Core   | 4 | 312 | I  | 25 | 73 | WM | 51  | High | 11 | Low  | 363   | Mut |
|    | 3 | Core   | 5 | 313 | I  | 16 | 74 | G  | 85  | High | 78 | High | 147.4 | Mut |
|    |   | Core   | 6 | 314 | I  | 11 | 73 | G  | 90  | High | 92 | High | 144.4 | Mut |
|    |   | Core   | 7 | 315 | I  | 15 | 75 | G  | 87  | High | 90 | High | 129.8 | Mut |
| 55 | 1 | Margin | 1 | 316 | I  | 25 | 75 | G  | 83  | High | 42 | Low  | 9.2   | WT  |
|    | 2 | Core   | 2 | 317 | I  | 50 | 60 | WM | 38  | Low  | 7  | Low  | 0     | WT  |
|    | 3 | Core   | 3 | 318 | E* | 22 | 67 | G  | 86  | High | 63 | High | 0     | WT  |
|    | 4 | N/A    | 4 | 319 | I  | 39 | 71 | WM | 72  | High | 27 | Low  | 0     | WT  |
| 56 | 1 | Core   | 1 | 320 | I  | 4  | 74 | G  | 100 | High | 67 | High | 7.9   | WT  |
|    | 2 | Core   | 2 | 321 | I  | 9  | 74 | G  | 97  | High | 61 | High | 40.2  | WT  |
|    |   | Core   | 3 | 322 | I  | 37 | 76 | G  | 91  | High | 52 | High | 34.3  | WT  |
|    |   | Core   | 4 | 323 | I  | 46 | 74 | G  | 83  | High | 60 | High | 63.1  | WT  |
| 57 | 1 | Core   | 1 | 324 | I  | 5  | 72 | G  | 72  | High | 82 | High | 403.1 | Mut |
|    | 2 | Core   | 2 | 325 | I  | 15 | 74 | G  | 57  | High | 76 | High | 588.5 | Mut |

**Supplemental Table 5. Continued**

|    |   |        |   |     |   |    |    |    |    |      |    |      |       |     |
|----|---|--------|---|-----|---|----|----|----|----|------|----|------|-------|-----|
| 57 | 2 | Core   | 3 | 326 | I | 11 | 72 | G  | 62 | High | 86 | High | 597.2 | Mut |
|    |   | Core   | 4 | 327 | I | 9  | 73 | G  | 77 | High | 91 | High | 367.5 | Mut |
| 58 | 1 | Core   | 1 | 328 | I | 14 | 74 | G  | 39 | Low  | 87 | High | 644   | Mut |
|    |   | Core   | 2 | 329 | I | 7  | 72 | G  | 50 | Low  | 98 | High | 579.1 | Mut |
|    | 2 | Margin | 3 | 330 | I | 5  | 74 | WM | 48 | Low  | 51 | High | 453.5 | Mut |
|    | 3 | Margin | 4 | 331 | I | 24 | 74 | WM | 11 | Low  | 9  | Low  | 125.1 | Mut |
|    | 4 | Core   | 5 | 332 | I | 19 | 74 | WM | 17 | Low  | 16 | Low  | 247.9 | Mut |
|    | 5 | Margin | 6 | 333 | I | 33 | 73 | WM | 0  | Low  | 5  | Low  | 72.5  | Mut |
|    | 6 | Core   | 7 | 334 | I | 23 | 73 | WM | 21 | Low  | 16 | Low  | 436.4 | Mut |

Cells with hyphens indicate that no MS scans met the inclusion criteria and were excluded from statistical analyses.

I = Included

E = Excluded

G = glioma

WM = White matter

GM = Grey Matter

For NAA predictions of TCP, the TCP categories were High  $\geq 51\%$  and Low  $\leq 50\%$ .

For lipid deconvolution TCP predictions, the TCP categories were High  $\geq 51\%$  and Low  $\leq 50\%$ .

WT = IDH-wildtype

Mut=IDH-mutant

Samples with “N/A” for the IDH assessment indicate that the smears were not analyzed with the 2-HG DESI-MS method.

**Supplemental Table 6.** Pathological evaluation of the tissue smears obtained from each study subject

| Sample Information |                       |                      |                      | Diagnosis | TCP-<br>Estimate | Smear<br>Quality |
|--------------------|-----------------------|----------------------|----------------------|-----------|------------------|------------------|
| Subject            | Biopsy #<br>(Subject) | Smear #<br>(Subject) | Smear #<br>(Overall) |           |                  |                  |
| 1                  | 1                     | 1                    | 1                    | G         | 100              | --               |
|                    | 2                     | 2                    | 2                    | G         | 100              | --               |
|                    | 3                     | 3                    | 3                    | G         | 100              | --               |
|                    | 4                     | 4                    | 4                    | G         | 100              | --               |
|                    | 5                     | 5                    | 5                    | G         | 100              | --               |
|                    | 6                     | 6                    | 6                    | G         | 100              | --               |
|                    | 7                     | 7                    | 7                    | G         | 100              | --               |
|                    | 8                     | 8                    | 8                    | G         | 100              | --               |
|                    | 9                     | 9                    | 9                    | I.M.      | 10               | BMA              |
| 5                  | 1                     | 1                    | 10                   | G         | 90               | --               |
|                    |                       | 2                    | 11                   | G         | 90               | --               |
|                    | 2                     | 3                    | 12                   | G         | 60               | --               |
|                    | 3                     | 4                    | 13                   | G         | 80               | --               |
|                    | 4                     | 5                    | 14                   | G         | 50               | --               |
|                    | 5                     | 6                    | 15                   | G         | 60               | --               |
|                    | 6                     | 7                    | 16                   | G         | 80               | --               |
|                    | 7                     | 8                    | 17                   | G         | 80               | --               |
| 6                  | 1                     | 1                    | 18                   | G         | 50               | --               |
|                    | 2                     | 2                    | 19                   | G         | 90               | --               |
|                    | 3                     | 3                    | 20                   | GM        | 0                | A                |
|                    | 4                     | 4                    | 21                   | G         | 70               | --               |
|                    | 5                     | 5                    | 22                   | G         | 50               | --               |
|                    |                       | 6                    | 23                   | I.M.      | 25               | MA               |
|                    | 6                     | 7                    | 24                   | I.M.      | 15               | --               |
| 7                  | 1                     | 1                    | 25                   | G         | 90               | --               |
|                    | 2                     | 2                    | 26                   | I.M.      | 10               | --               |
|                    | 3                     | 3                    | 27                   | G         | 50               | --               |
|                    | 4                     | 4                    | 28                   | G         | 50               | --               |
|                    | 5                     | 5                    | 29                   | I.M.      | 10               | --               |
|                    |                       | 6                    | 30                   | G         | 30               | --               |

**Supplemental Table 6. Continued**

|    |   |    |    |      |    |     |
|----|---|----|----|------|----|-----|
| 9  | 1 | 1  | 31 | G    | 90 | --  |
|    |   | 2  | 32 | G    | 90 | --  |
|    | 2 | 3  | 33 | I.M. | 30 | --  |
|    | 3 | 4  | 34 | I.M. | 50 | --  |
|    | 4 | 5  | 35 | G    | 60 | --  |
|    |   | 6  | 36 | I.M. | 30 | --  |
|    | 5 | 7  | 37 | I.M. | 15 | --  |
|    | 6 | 8  | 38 | G    | 95 | --  |
| 10 | 7 | 9  | 39 | I.M. | 20 | --  |
|    | 1 | 1  | 40 | I.M. | 30 | --  |
|    | 2 | 2  | 41 | GM   | 0  | MA  |
|    | 3 | 3  | 42 | G    | 80 | --  |
|    | 4 | 4  | 43 | G    | 80 | --  |
|    |   | 5  | 44 | G    | 50 | --  |
|    | 5 | 6  | 45 | G    | 60 | --  |
|    | 6 | 7  | 46 | I.M. | 50 | --  |
| 12 | 1 | 1  | 47 | G    | 70 | --  |
|    |   | 2  | 48 | G    | 70 | --  |
|    | 2 | 3  | 49 | GM   | 0  | BMA |
|    | 3 | 4  | 50 | G    | 70 | --  |
|    | 4 | 5  | 51 | I.M. | 40 | --  |
|    | 5 | 6  | 52 | G    | 80 | --  |
|    | 6 | 7  | 53 | I.M. | 50 | --  |
|    | 7 | 8  | 54 | G    | 70 | --  |
| 13 | 1 | 1  | 55 | G    | 90 | --  |
|    |   | 2  | 56 | G    | 90 | --  |
|    | 2 | 3  | 57 | G    | 90 | --  |
|    |   | 4  | 58 | G    | 90 | --  |
|    | 3 | 5  | 59 | WM   | 0  | BMA |
|    |   | 6  | 60 | WM   | 0  | MA  |
|    | 4 | 7  | 61 | WM   | 0  | BMA |
|    | 5 | 8  | 62 | WM   | 0  | BMA |
|    | 6 | 9  | 63 | I.M. | 5  | --  |
|    | 7 | 10 | 64 | I.M. | 5  | --  |

**Supplemental Table 6. Continued**

|    |   |   |     |        |     |     |
|----|---|---|-----|--------|-----|-----|
| 14 | 1 | 1 | 65  | --     | --  | IA  |
|    | 2 | 2 | 66  | I.M.   | 30  | --  |
|    | 3 | 3 | 67  | A.C.T. | 100 | --  |
|    |   | 4 | 68  | A.C.T. | 100 | --  |
|    | 4 | 5 | 69  | G      | 70  | --  |
|    | 5 | 6 | 70  | G      | 90  | --  |
|    | 6 | 7 | 71  | G      | 90  | --  |
|    |   | 8 | 72  | G      | 90  | --  |
| 15 | 1 | 1 | 73  | G      | 75  | --  |
|    |   | 2 | 74  | G      | 75  | --  |
|    | 2 | 3 | 75  | G      | 75  | --  |
|    |   | 4 | 76  | G      | 80  | --  |
|    | 3 | 5 | 77  | G      | 80  | --  |
|    | 4 | 6 | 78  | WM     | 10  | --  |
|    |   | 7 | 79  | GM     | 20  | --  |
|    | 5 | 8 | 80  | WM     | 10  | --  |
| 16 | 1 | 1 | 82  | I.M.   | 30  | --  |
|    |   | 2 | 83  | G      | 70  | --  |
|    |   | 3 | 84  | G      | 75  | MA  |
|    |   | 4 | 85  | I.M.   | 30  | MA  |
|    |   | 5 | 86  | I.M.   | 30  | --  |
|    |   | 6 | 87  | I.M.   | 40  | --  |
|    |   | 7 | 88  | I.M.   | 40  | MA  |
|    | 7 | 7 | 88  | I.M.   | 40  | MA  |
| 17 | 1 | 1 | 89  | G      | 70  | --  |
|    | 2 | 2 | 90  | G      | 80  | --  |
|    | 3 | 3 | 91  | WM     | 0   | A   |
|    | 4 | 4 | 92  | G      | 50  | --  |
| 18 | 1 | 1 | 93  | G      | 50  | BMA |
|    |   | 2 | 94  | G      | 50  | IA  |
|    | 2 | 3 | 95  | I.M.   | 10  | MA  |
|    | 3 | 4 | 96  | I.M.   | 10  | MA  |
|    | 4 | 5 | 97  | I.M.   | 20  | --  |
|    |   | 6 | 98  | I.M.   | 10  | --  |
|    | 5 | 7 | 99  | WM     | 0   | A   |
|    |   | 8 | 100 | WM     | 0   | MA  |

**Supplemental Table 6. Continued**

|    |   |    |     |      |    |    |
|----|---|----|-----|------|----|----|
| 19 | 1 | 1  | 101 | G    | 90 | -- |
|    | 2 | 2  | 102 | G    | 40 | IA |
|    | 3 | 3  | 103 | G    | 90 | -- |
|    |   | 4  | 104 | G    | 90 | -- |
|    | 4 | 5  | 105 | G    | 90 | -- |
|    | 5 | 6  | 106 | WM   | 5  | -- |
|    |   | 7  | 107 | WM   | 5  | -- |
|    | 6 | 8  | 108 | WM   | 30 | -- |
|    | 7 | 9  | 109 | GM   | 5  | -- |
|    |   | 10 | 110 | GM   | 5  | -- |
| 20 | 1 | 1  | 111 | G    | 70 | -- |
|    |   | 2  | 112 | G    | 70 | -- |
|    | 2 | 3  | 113 | G    | 70 | -- |
|    |   | 4  | 114 | G    | 90 | MA |
|    | 3 | 5  | 115 | WM   | 5  | -- |
|    | 4 | 6  | 116 | G    | 70 | -- |
|    | 5 | 7  | 117 | WM   | 5  | -- |
|    |   | 8  | 118 | WM   | 5  | -- |
| 21 | 1 | 1  | 119 | I.M. | 20 | MA |
|    |   | 2  | 120 | G    | 50 | -- |
|    | 2 | 3  | 121 | G    | 40 | -- |
|    |   | 4  | 122 | G    | 80 | A  |
|    | 3 | 5  | 123 | G    | 60 | -- |
|    |   | 6  | 124 | G    | 70 | MA |
|    | 4 | 7  | 125 | G    | 40 | -- |
|    |   | 8  | 126 | G    | 60 | -- |
|    | 5 | 9  | 127 | I.M. | 5  | -- |
|    | 6 | 10 | 128 | I.M. | 5  | -- |
| 23 | 1 | 1  | 129 | --   | -- | -- |
|    | 2 | 2  | 130 | G    | 90 | -- |
|    |   | 3  | 131 | G    | 90 | IA |
|    | 3 | 4  | 132 | G    | 90 | -- |
|    |   | 5  | 133 | G    | 90 | -- |
|    | 1 | 6  | 134 | --   | -- | -- |
|    |   | 7  | 135 | --   | -- | -- |
|    | 4 | 8  | 136 | G    | 90 | -- |
|    |   | 9  | 137 | G    | 90 | -- |

**Supplemental Table 6. Continued**

|    |   |    |     |      |    |    |
|----|---|----|-----|------|----|----|
| 24 | 1 | 1  | 138 | G    | 70 | -- |
|    |   | 2  | 139 | G    | 80 | -- |
|    | 2 | 3  | 140 | G    | 80 | -- |
| 25 | 1 | 1  | 141 | G    | 60 | -- |
|    | 2 | 2  | 142 | G    | 70 | -- |
|    | 3 | 3  | 143 | G    | 80 | -- |
|    |   | 4  | 144 | G    | 50 | -- |
|    | 4 | 5  | 145 | G    | 90 | -- |
|    | 5 | 6  | 146 | WM   | 5  | -- |
|    | 6 | 7  | 147 | WM   | 5  | -- |
|    | 7 | 8  | 148 | WM   | 5  | -- |
|    | 5 | 9  | 149 | WM   | 5  | -- |
| 26 | 7 | 10 | 150 | WM   | 5  | -- |
|    | 1 | 1  | 151 | G    | 80 | -- |
|    | 2 | 2  | 152 | I.M. | 10 | -- |
|    | 3 | 3  | 153 | WM   | 5  | -- |
|    | 4 | 4  | 154 | WM   | 10 | -- |
| 27 | 5 | 5  | 155 | G    | 60 | -- |
|    | 1 | 1  | 156 | G    | 90 | MA |
|    |   | 2  | 157 | G    | 90 | MA |
|    | 2 | 3  | 158 | G    | 90 | MA |
|    | 3 | 4  | 159 | G    | 90 | MA |
|    |   | 5  | 160 | G    | 90 | A  |
|    | 4 | 6  | 161 | G    | 90 | MA |
|    |   | 7  | 162 | G    | 90 | MA |
|    | 5 | 8  | 163 | G    | 90 | MA |
| 28 | 6 | 9  | 164 | G    | 90 | A  |
|    | 5 | 10 | 165 | G    | 90 | A  |
|    | 1 | 1  | 166 | G    | 90 | A  |
|    | 2 | 2  | 167 | I.M. | 0  | MA |
|    | 3 | 3  | 168 | GM   | 10 | A  |
|    |   | 4  | 169 | GM   | 10 | A  |
|    | 4 | 5  | 170 | G    | 50 | MA |
|    |   | 6  | 171 | G    | 60 | MA |
|    | 5 | 7  | 172 | GM   | 20 | A  |
|    |   | 8  | 173 | GM   | 0  | A  |

**Supplemental Table 6. Continued**

|    |   |    |     |      |    |     |
|----|---|----|-----|------|----|-----|
| 29 | 1 | 1  | 174 | --   | -- | --  |
|    |   | 2  | 175 | G    | 60 | MA  |
|    | 2 | 3  | 176 | I.M. | 20 | MA  |
|    |   | 4  | 177 | I.M. | 20 | BMA |
|    | 3 | 5  | 178 | WM   | 0  | BMA |
|    | 4 | 6  | 179 | WM   | 10 | MA  |
|    | 5 | 7  | 180 | WM   | 10 | MA  |
|    | 6 | 8  | 181 | WM   | 10 | A   |
|    |   | 9  | 182 | WM   | 10 | A   |
|    |   | 10 | 183 | WM   | 10 | MA  |
| 30 | 1 | 1  | 184 | I.M. | 30 | MA  |
|    |   | 2  | 185 | I.M. | 15 | MA  |
|    | 2 | 3  | 186 | WM   | 5  | A   |
|    | 3 | 4  | 187 | WM   | 5  | A   |
|    | 4 | 5  | 188 | WM   | 5  | A   |
|    | 5 | 6  | 189 | GM   | 10 | A   |
|    | 5 | 6  | 189 | GM   | 10 | A   |
| 31 | 1 | 1  | 190 | G    | 90 | A   |
|    |   | 2  | 191 | G    | 90 | A   |
|    | 2 | 3  | 192 | G    | 90 | MA  |
|    | 3 | 4  | 193 | WM   | 15 | MA  |
|    | 4 | 5  | 194 | --   | -- | --  |
|    | 5 | 6  | 195 | G    | 50 | MA  |
| 32 | 1 | 1  | 196 | GM   | 10 | A   |
|    | 2 | 2  | 197 | GM   | 10 | MA  |
|    |   | 3  | 198 | GM   | 10 | A   |
|    | 3 | 4  | 199 | WM   | 5  | A   |
|    | 4 | 5  | 200 | WM   | 5  | A   |
|    | 5 | 6  | 201 | I.M. | 5  | MA  |
|    |   | 7  | 202 | I.M. | 5  | MA  |
| 33 | 1 | 1  | 203 | GM   | 10 | A   |
|    | 2 | 2  | 204 | GM   | 10 | A   |
|    | 3 | 3  | 205 | G    | 60 | MA  |
|    | 4 | 4  | 206 | G    | 60 | MA  |
|    | 5 | 5  | 207 | G    | -- | IA  |
|    | 6 | 6  | 208 | I.M. | 30 | MA  |

**Supplemental Table 6. Continued**

|    |   |   |     |      |     |    |
|----|---|---|-----|------|-----|----|
| 34 | 1 | 1 | 209 | GM   | 10  | A  |
|    |   | 2 | 210 | GM   | 10  | A  |
|    | 2 | 3 | 211 | G    | 70  | A  |
|    |   | 4 | 212 | G    | 70  | MA |
|    | 3 | 5 | 213 | G    | 70  | MA |
|    |   | 6 | 214 | G    | 70  | MA |
| 35 | 1 | 1 | 215 | WM   | 10  | A  |
|    | 2 | 2 | 216 | G    | 90  | A  |
|    | 3 | 3 | 217 | WM   | 10  | A  |
|    | 4 | 4 | 218 | WM   | 10  | A  |
|    | 5 | 5 | 219 | WM   | 0   | MA |
|    | 6 | 6 | 220 | WM   | 0   | MA |
| 37 | 1 | 1 | 221 | G    | 90  | MA |
|    |   | 2 | 222 | G    | 70  | MA |
|    | 2 | 3 | 223 | G    | 80  | A  |
|    | 3 | 4 | 224 | G    | 80  | A  |
|    | 4 | 5 | 225 | G    | 80  | A  |
| 38 | 1 | 1 | 226 | G    | 80  | MA |
|    | 2 | 2 | 227 | G    | 80  | A  |
|    | 3 | 3 | 228 | WM   | 30  | A  |
|    | 4 | 4 | 229 | GM   | 20  | MA |
|    | 5 | 5 | 230 | WM   | 0   | MA |
|    | 6 | 6 | 231 | I.M. | 10  | MA |
| 39 | 1 | 1 | 232 | I.M. | 0   | A  |
|    | 2 | 2 | 233 | WM   | 0   | A  |
|    | 3 | 3 | 234 | WM   | 0   | A  |
| 40 | 1 | 1 | 235 | G    | 100 | A  |
|    |   | 2 | 236 | G    | 100 | A  |
|    | 2 | 3 | 237 | G    | 100 | A  |
|    |   | 4 | 238 | G    | 100 | A  |
|    | 3 | 5 | 239 | WM   | 20  | MA |
|    |   | 6 | 240 | WM   | 20  | MA |
| 41 | 1 | 1 | 241 | WM   | 0   | A  |
|    | 2 | 2 | 242 | WM   | 0   | A  |
|    | 3 | 3 | 243 | GM   | 0   | A  |
|    | 4 | 4 | 244 | I.M. | 5   | A  |
|    | 5 | 5 | 245 | I.M. | 5   | MA |
| 42 | 1 | 1 | 246 | G    | 0   | A  |
|    | 2 | 2 | 247 | G    | 80  | A  |
|    | 3 | 3 | 248 | --   | --  | IA |

**Supplemental Table 6. Continued**

|    |   |    |     |      |     |    |
|----|---|----|-----|------|-----|----|
| 44 | 1 | 1  | 249 | G    | 100 | A  |
|    |   | 2  | 250 | G    | 100 | A  |
|    |   | 3  | 251 | G    | 100 | A  |
|    | 2 | 4  | 252 | G    | 100 | A  |
|    | 3 | 5  | 253 | G    | 100 | A  |
|    |   | 6  | 254 | G    | 100 | A  |
|    | 4 | 7  | 255 | G    | 100 | A  |
|    | 5 | 8  | 256 | GM   | 0   | A  |
|    | 6 | 9  | 257 | GM   | 60  | A  |
|    |   | 10 | 258 | GM   | 0   | A  |
| 45 | 1 | 1  | 259 | T    | 100 | A  |
| 46 | 1 | 1  | 260 | G    | 60  | MA |
|    |   | 2  | 261 | G    | 80  | A  |
|    | 2 | 3  | 262 | G    | 80  | A  |
|    | 3 | 4  | 263 | G    | 60  | A  |
|    |   | 5  | 264 | G    | 80  | A  |
|    |   | 6  | 265 | G    | 80  | A  |
|    | 4 | 7  | 266 | G    | 60  | A  |
|    | 5 | 8  | 267 | I.M. | 0   | A  |
|    | 6 | 9  | 268 | WM   | 5   | A  |
| 47 | 1 | 1  | 269 | WM   | 20  | MA |
|    |   | 2  | 270 | WM   | 30  | A  |
|    | 2 | 3  | 271 | G    | 100 | A  |
|    |   | 4  | 272 | G    | 100 | A  |
|    | 3 | 5  | 273 | I.M. | 50  | A  |
|    |   | 6  | 274 | I.M. | 50  | A  |
|    | 4 | 7  | 275 | WM   | 40  | A  |
|    |   | 8  | 276 | WM   | 40  | A  |
| 48 | 1 | 1  | 277 | GM   | 10  | A  |
|    |   | 2  | 278 | GM   | 0   | A  |
|    | 2 | 3  | 279 | WM   | 60  | A  |
|    |   | 4  | 280 | G    | 50  | A  |
|    | 3 | 5  | 281 | GM   | 50  | MA |
|    |   | 6  | 282 | G    | 50  | A  |
|    |   | 7  | 283 | G    | 70  | A  |

**Supplemental Table 6. Continued**

|    |   |   |     |      |     |    |
|----|---|---|-----|------|-----|----|
| 50 | 1 | 1 | 284 | WM   | 20  | MA |
|    | 2 | 2 | 285 | GM   | 15  | A  |
|    | 3 | 3 | 286 | WM   | 20  | MA |
|    | 4 | 4 | 287 | GM   | 0   | A  |
|    | 5 | 5 | 288 | WM   | 50  | MA |
|    | 6 | 6 | 289 | WM   | 50  | MA |
| 51 | 1 | 1 | 290 | G    | 100 | A  |
|    | 2 | 2 | 291 | T    | 100 | A  |
|    | 3 | 3 | 292 | T    | 100 | A  |
|    | 4 | 4 | 293 | T    | 100 | A  |
|    | 5 | 5 | 294 | T    | 100 | A  |
|    | 6 | 6 | 295 | T    | 100 | A  |
| 52 | 1 | 1 | 296 | GM   | 20  | MA |
|    | 2 | 2 | 297 | I.M. | 30  | -- |
|    | 3 | 3 | 298 | WM   | --  | IA |
|    |   | 4 | 299 | I.M. | 40  | MA |
| 53 | 1 | 1 | 300 | WM   | 10  | MA |
|    | 2 | 2 | 301 | GM   | 10  | MA |
|    |   | 3 | 302 | GM   | 10  | A  |
|    | 3 | 4 | 303 | I.M. | 20  | A  |
|    |   | 5 | 304 | GM   | 40  | A  |
|    | 4 | 6 | 305 | WM   | 30  | MA |
|    | 5 | 7 | 306 | WM   | 30  | MA |
|    | 6 | 8 | 307 | GM   | 0   | MA |
|    |   | 9 | 308 | GM   | 0   | A  |
| 54 | 1 | 1 | 309 | --   | --  | IA |
|    |   | 2 | 310 | --   | --  | IA |
|    | 2 | 3 | 311 | GM   | 10  | MA |
|    |   | 4 | 312 | GM   | 10  | MA |
|    | 3 | 5 | 313 | WM   | 40  | MA |
|    |   | 6 | 314 | G    | 60  | MA |
|    |   | 7 | 315 | G    | 70  | MA |
| 55 | 1 | 1 | 316 | G    | 100 | A  |
|    | 2 | 2 | 317 | WM   | 10  | A  |
|    | 3 | 3 | 318 | --   | --  | IA |
|    | 4 | 4 | 319 | GM   | 30  | A  |
| 56 | 1 | 1 | 320 | G    | 100 | MA |
|    | 2 | 2 | 321 | G    | 100 | MA |
|    |   | 3 | 322 | G    | 100 | A  |
|    |   | 4 | 323 | G    | 100 | A  |

**Supplemental Table 6. Continued**

|    |   |   |     |      |    |    |
|----|---|---|-----|------|----|----|
| 57 | 1 | 1 | 324 | G    | 80 | A  |
|    | 2 | 2 | 325 | G    | 80 | A  |
|    |   | 3 | 326 | G    | 80 | MA |
|    |   | 4 | 327 | G    | 80 | A  |
| 58 | 1 | 1 | 328 | G    | 80 | A  |
|    |   | 2 | 329 | G    | 50 | MA |
|    | 2 | 3 | 330 | I.M. | 10 | A  |
|    | 3 | 4 | 331 | WM   | 0  | A  |
|    | 4 | 5 | 332 | WM   | 0  | A  |
|    | 5 | 6 | 333 | WM   | 0  | A  |
|    | 6 | 7 | 334 | WM   | 0  | A  |

G = Glioma

WM = White matter

GM = Grey Matter

A = Adequate

MA = Marginally adequate

BMA = Barely marginally adequate

IA = Inadequate

Tissue smears with inadequate quality (IA) were not evaluated by EMH. The Smear Quality datapoint was not evaluated for all of the smears in the study; Smear Quality cells with hyphens indicate that smear was not evaluated for smear quality.

**Supplemental Table 7.** Confusion matrix showing correlation between histopathology and PCA-LDA cross-validation predictions of TCP category using the lipid profiles obtained from the n=272 intraoperative tissue smears. Four principal components and five cross-validation groups were used.

|                        |             | Histopathology TCP |      | Total |
|------------------------|-------------|--------------------|------|-------|
|                        |             | Low                | High |       |
| PCA-LDA TCP Prediction | Low         | 108                | 13   | 121   |
|                        | High        | 45                 | 106  | 151   |
|                        | Total       | 153                | 119  | 272   |
|                        | Sensitivity | 70.6%              |      |       |
|                        | Specificity | 89.6%              |      |       |
|                        | Accuracy    | 78.6%              |      |       |

**Supplemental Table 8.** Confusion matrix showing correlation between histopathology and PCA-LDA cross-validation predictions of TCP category using the metabolite profiles obtained from the n=272 intraoperative tissue smears. Six principal components and five cross-validation groups were used.

|                        |             | Histopathology TCP |      | Total |
|------------------------|-------------|--------------------|------|-------|
|                        |             | Low                | High |       |
| PCA-LDA TCP Prediction | Low         | 127                | 42   | 169   |
|                        | High        | 26                 | 77   | 103   |
|                        | Total       | 153                | 119  | 272   |
|                        | Sensitivity | 83.0%              |      |       |
|                        | Specificity | 64.7%              |      |       |
|                        | Accuracy    | 75.0%              |      |       |

**Supplemental Table 9.** Confusion matrix comparing DESI and histopathology TCP predictions for the grade I-III margin biopsies.

|                                             |                                          | Histopathology <sup>a</sup>  |                                          |
|---------------------------------------------|------------------------------------------|------------------------------|------------------------------------------|
|                                             |                                          | High TCP/Glioma <sup>b</sup> | Low TCP/Infiltrative Margin <sup>b</sup> |
| <b>Full-scan NAA Intensity TCP Estimate</b> | High TCP/Glioma <sup>b</sup>             | 10                           | 9                                        |
| <b>Lipid Deconvolution TCP Estimate</b>     |                                          | 5                            | 6                                        |
| <b>Full-scan NAA Intensity TCP Estimate</b> | Low TCP/Infiltrative Margin <sup>b</sup> | 0                            | 26                                       |
| <b>Lipid Deconvolution TCP Estimate</b>     |                                          | 5                            | 29                                       |

**Full-scan NAA Intensity TCP Estimate**

- Sensitivity: 100%
- Specificity: 74%
- Accuracy: 80%

**Lipid Deconvolution TCP Estimate:**

- Sensitivity: 50%
- Specificity: 83%
- Accuracy: 76%

<sup>a</sup>Histopathology assessments of TCP were used for correlation with lipid deconvolution and NAA intensity classifications of TCP.

<sup>b</sup>For lipid deconvolution and NAA intensity classification, histopathology TCP categories were High  $\geq 51\%$  and Low  $\leq 50\%$ .

**Supplemental Table 10.** Confusion matrix comparing DESI and histopathology TCP predictions for the grade IV margin biopsies.

|                                             |                                          | Histopathology <sup>a</sup>  |                                          |
|---------------------------------------------|------------------------------------------|------------------------------|------------------------------------------|
|                                             |                                          | High TCP/Glioma <sup>b</sup> | Low TCP/Infiltrative Margin <sup>b</sup> |
| <b>Full-scan NAA Intensity TCP Estimate</b> | High TCP/Glioma <sup>b</sup>             | 12                           | 0                                        |
| <b>Lipid Deconvolution TCP Estimate</b>     |                                          | 8                            | 0                                        |
| <b>Full-scan NAA Intensity TCP Estimate</b> | Low TCP/Infiltrative Margin <sup>b</sup> | 1                            | 19                                       |
| <b>Lipid Deconvolution TCP Estimate</b>     |                                          | 5                            | 19                                       |

**Full-scan NAA Intensity TCP Estimate**

- Sensitivity: 92%
- Specificity: 100%
- Accuracy: 97%

**Lipid Deconvolution TCP Estimate:**

- Sensitivity: 62%
- Specificity: 100%
- Accuracy: 84%

<sup>a</sup>Histopathology assessments of TCP were used for correlation with lipid deconvolution and NAA intensity classifications of TCP.

<sup>b</sup>For lipid deconvolution and NAA intensity classification, histopathology TCP categories were High  $\geq 51\%$  and Low  $\leq 50\%$ .
